# Supplementary material
Source: PubMed Central journal article supplement (PMC8269213)
Supplement: msystems.00185-21-sf005.pdf [file msystems.00185-21-sf005.pdf]

*K. pneumoniae*

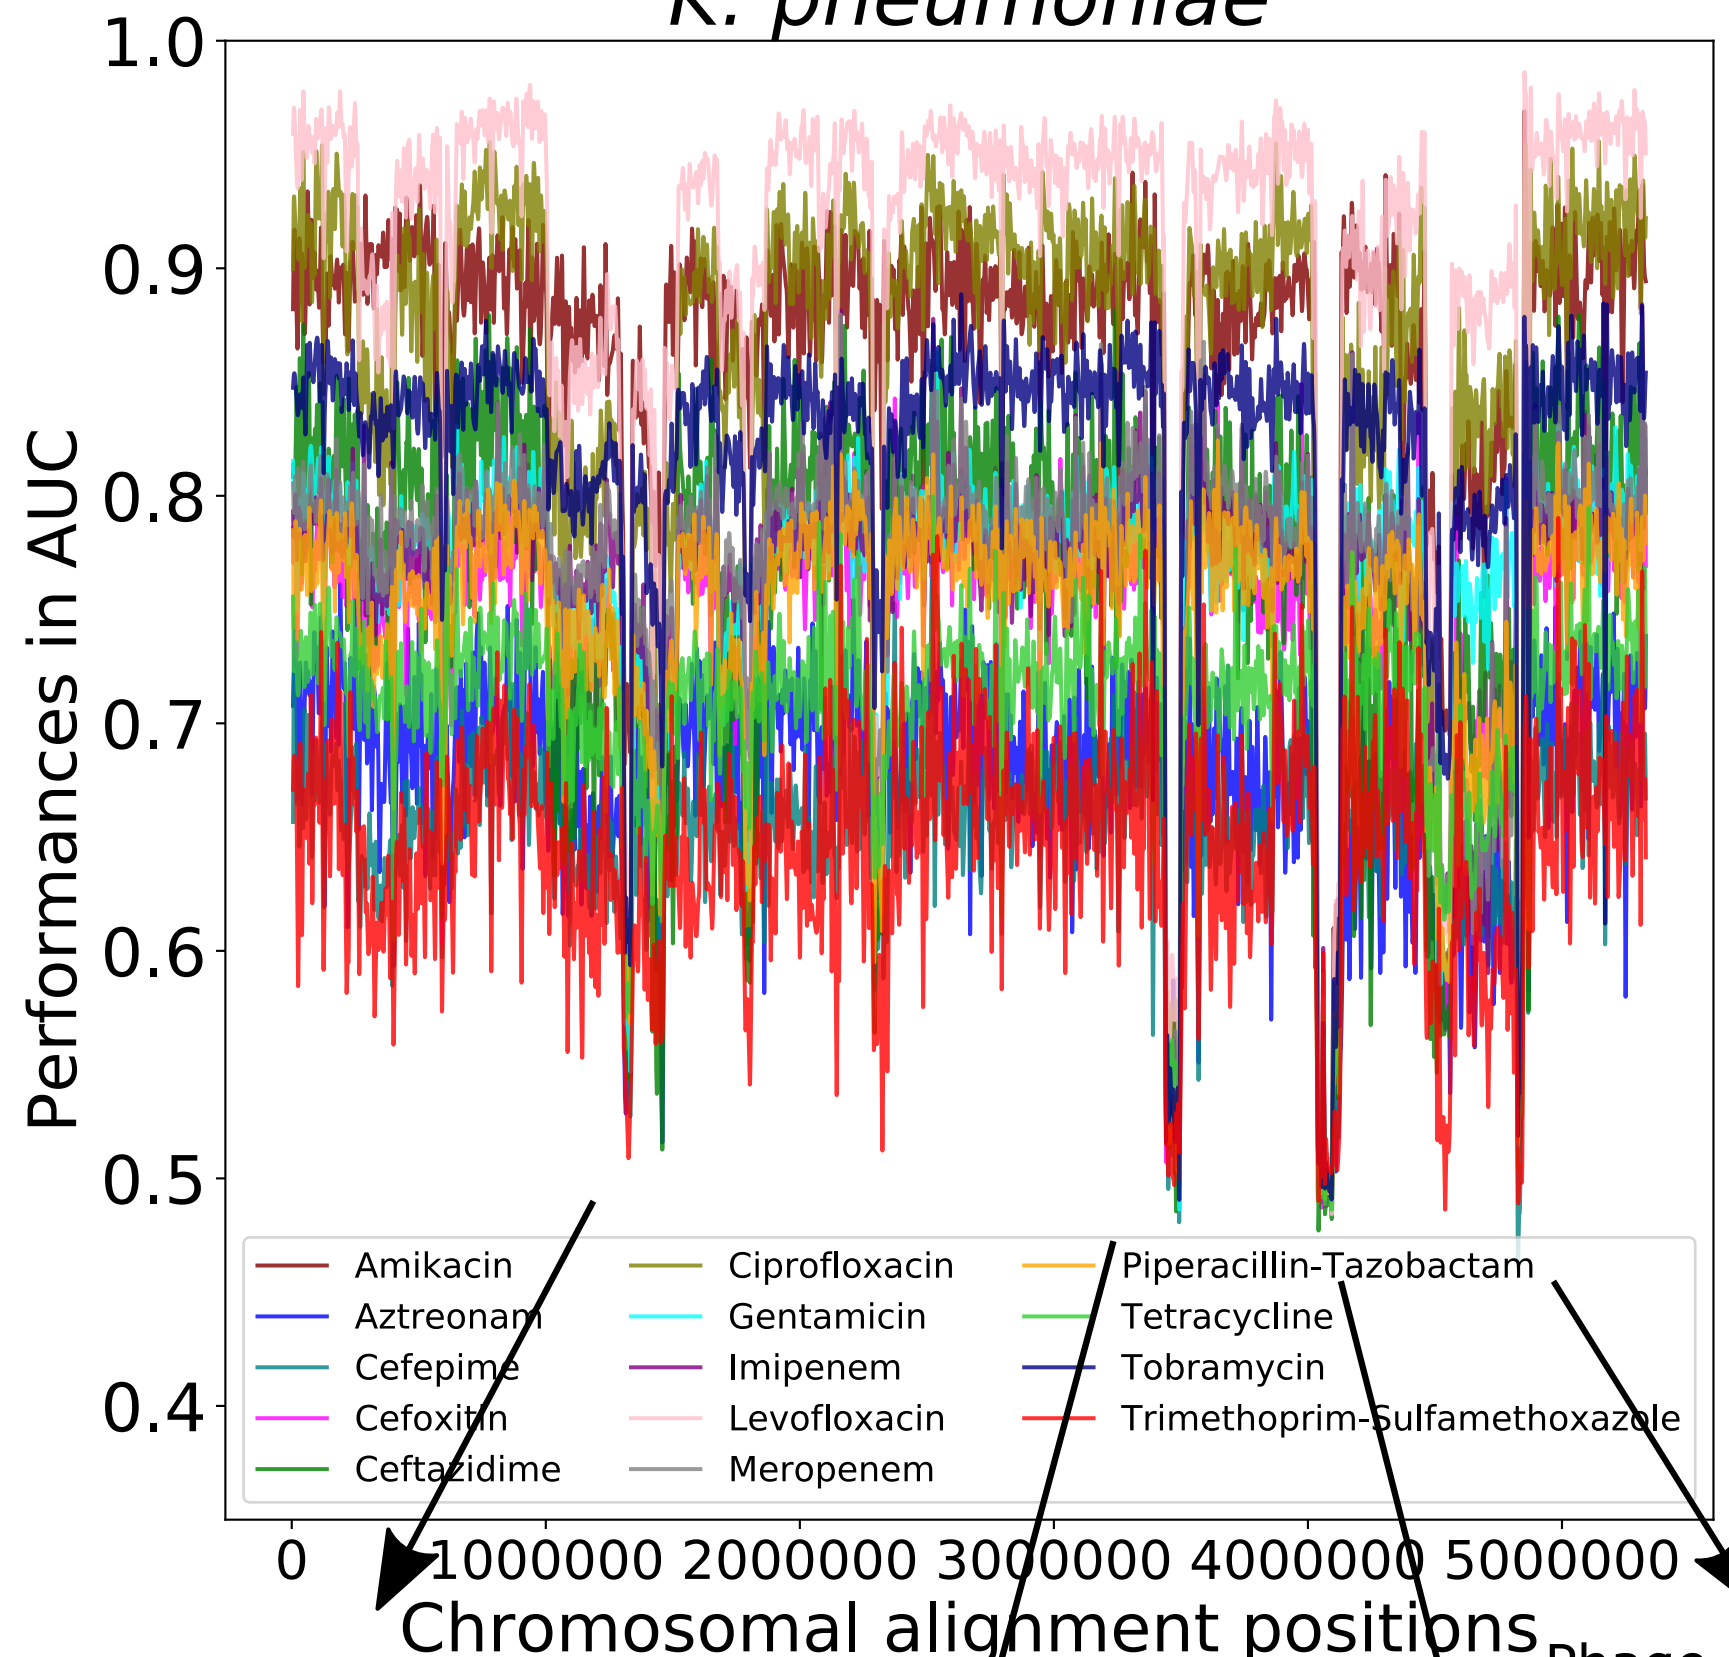

Phage related proteins  
 Iron aquisition yersiniabactin synthesis enzymes  
 Inner membrane protein of type IV secretion of T-DNA complex  
 Phage related proteins  
 rRNA subunits  
 tRNA-Thr-GGT  
 Phage related proteins  
 Ribonucleotide reduction proteins  
 tRNA-Thr-GGT

*M. tuberculosis*

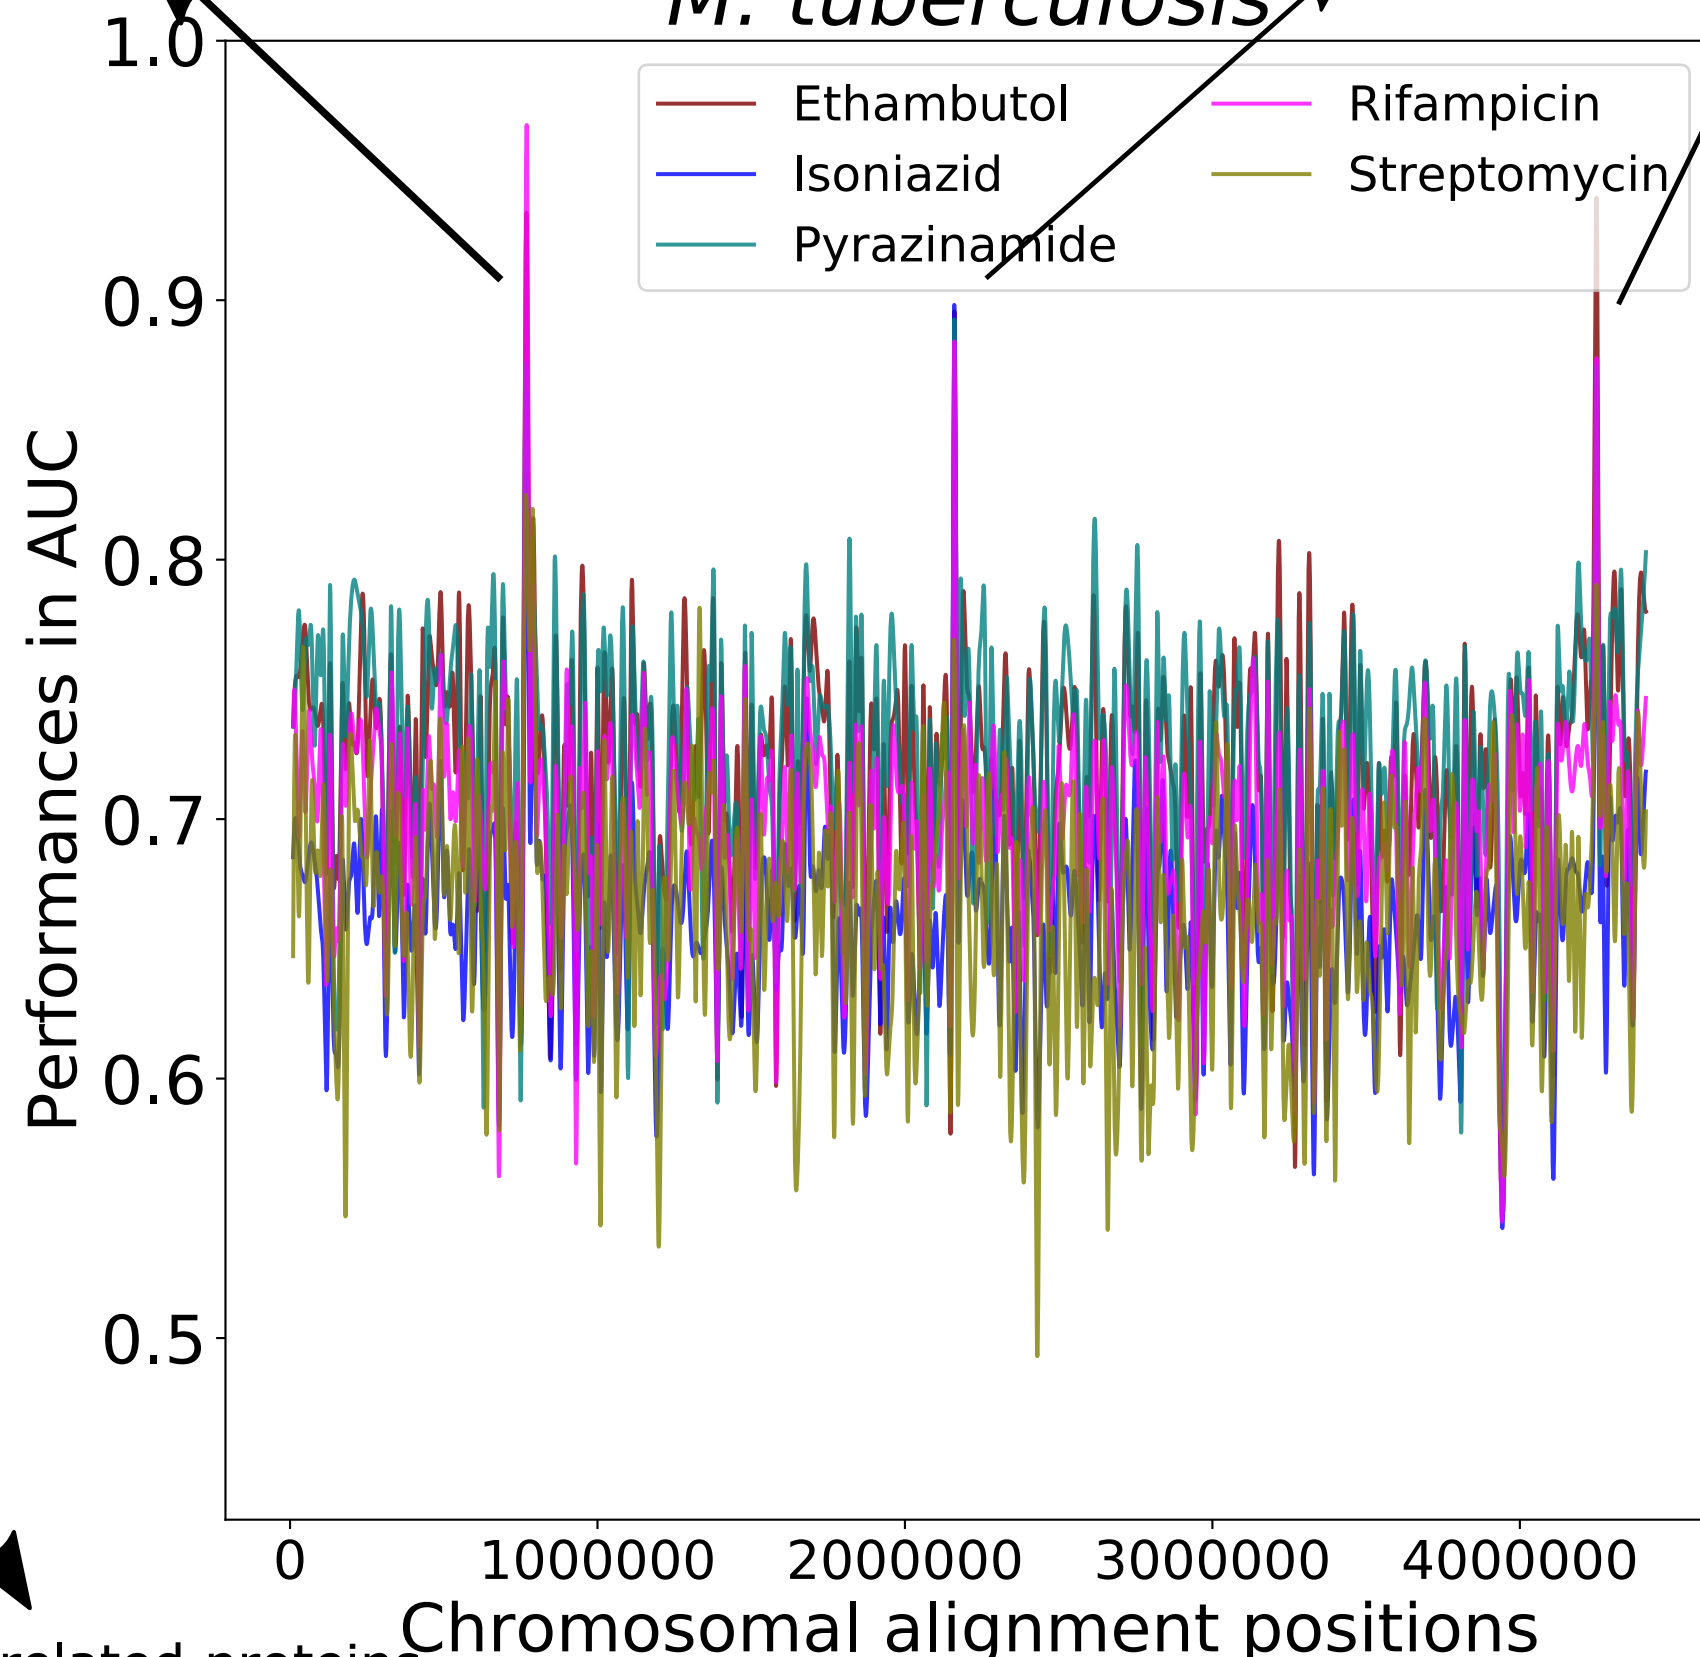

Catalase-peroxidase KatG  
 Phosphatidylethanolamine-binding protein  
 Oxidoreductase FadB5  
 MBL-fold metallo-hydrolase superfamily

*S. enterica*

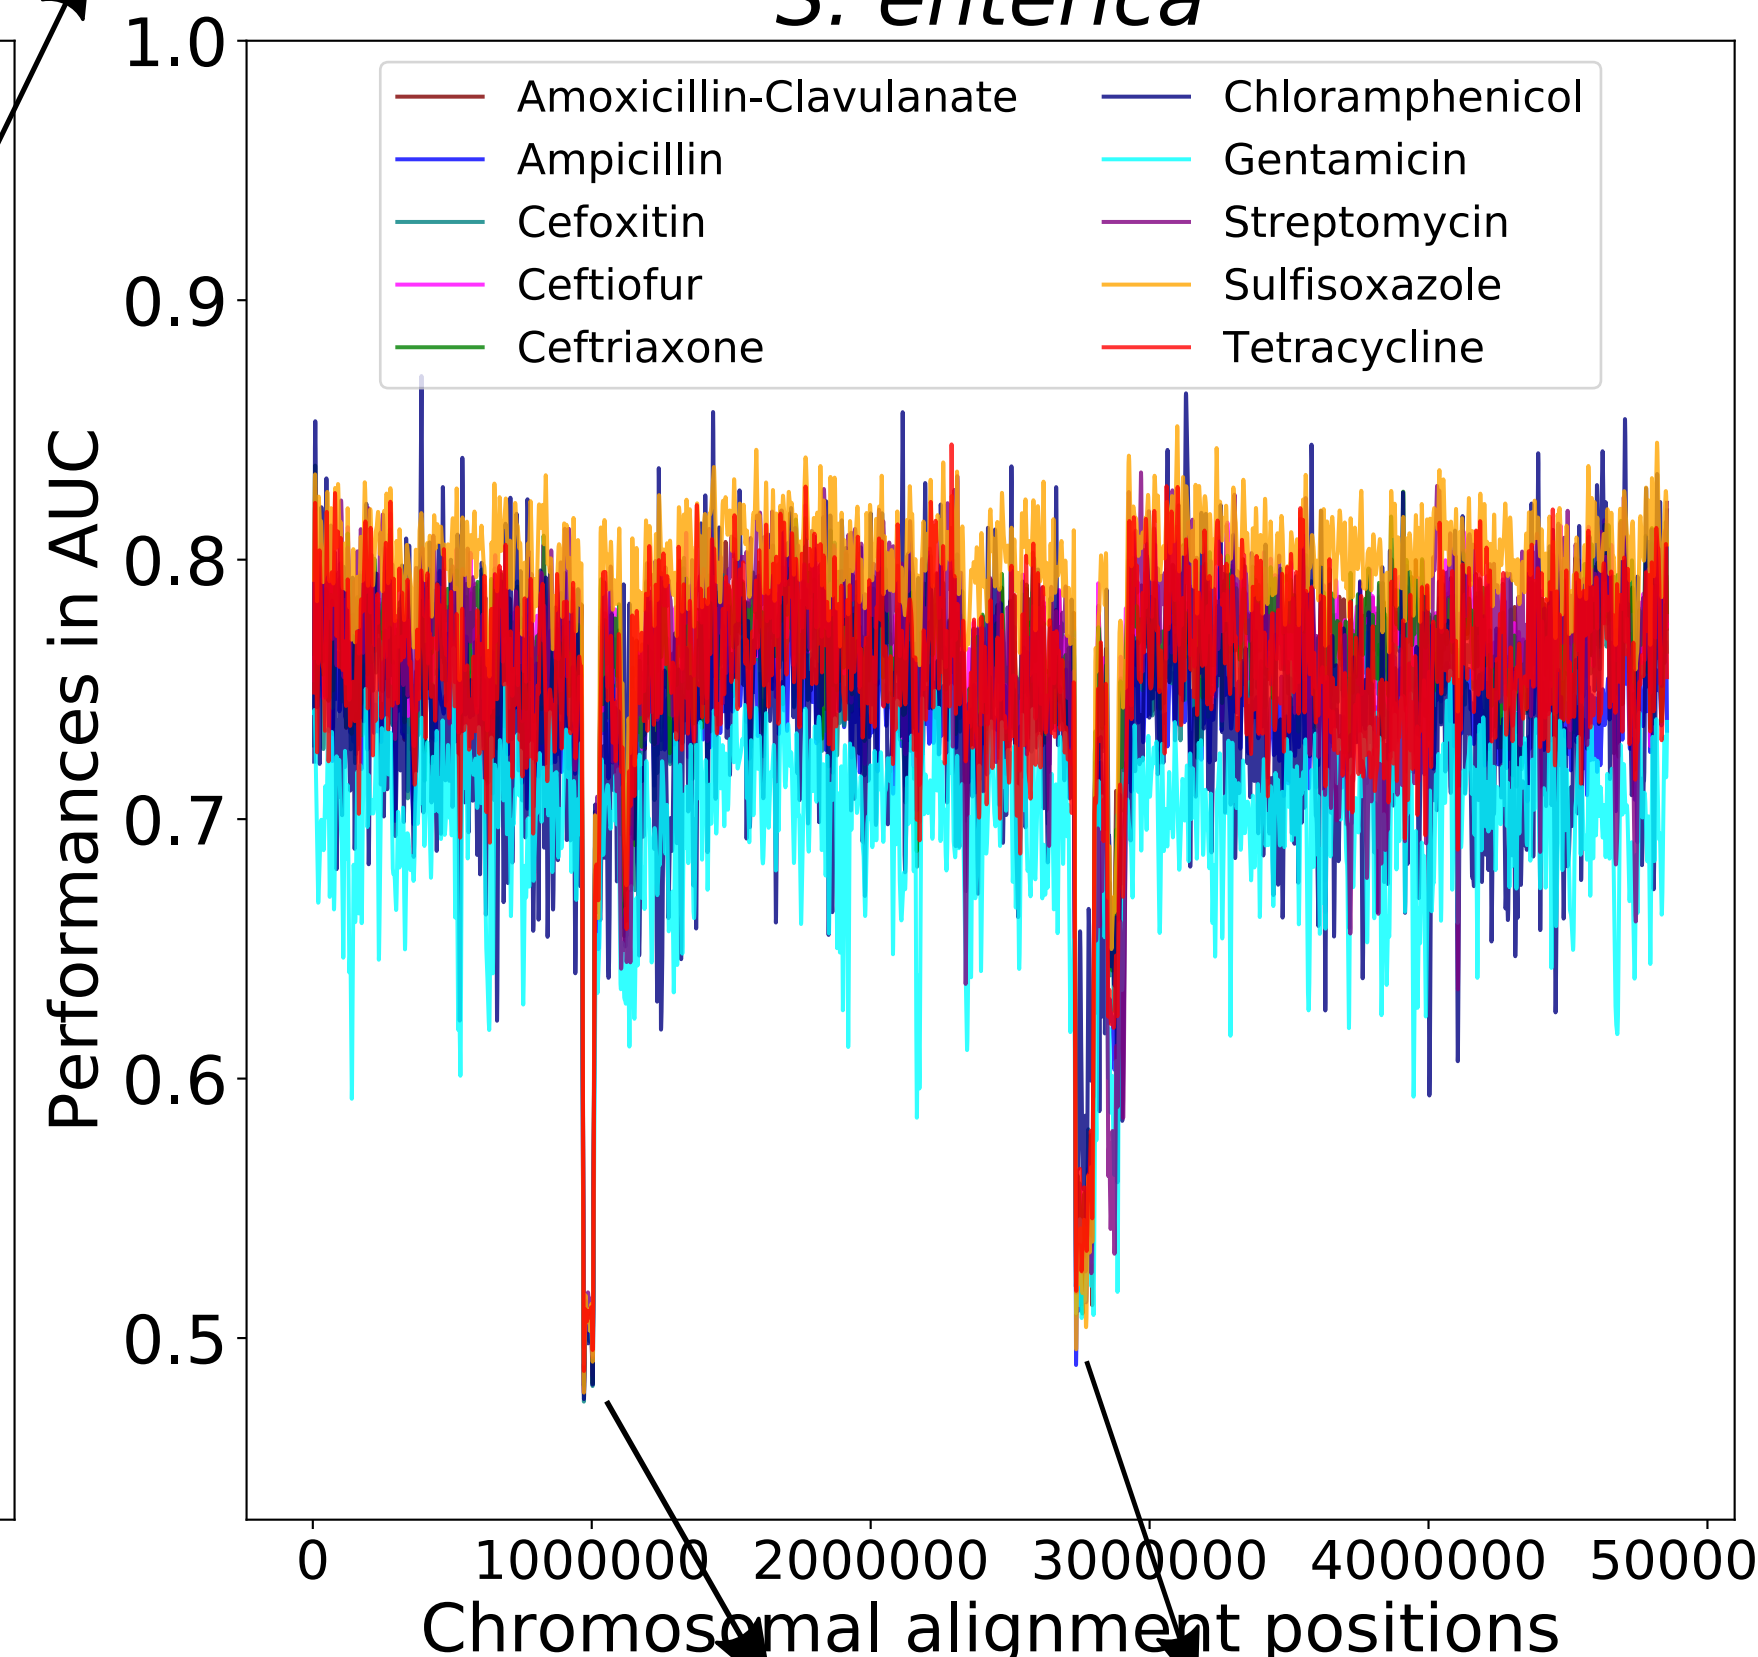

Integral membrane indolylacetylinsitol arabinosyltransferase EmbA, EmbB, EmbC  
 Phage related proteins  
 Phage related proteins  
 Sigma factor RpoE regulatory proteins
