# Supplementary material
Source: PubMed Central journal article supplement (PMC8269213)

# *K. pneumoniae*

Tree scale: 100000

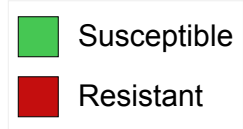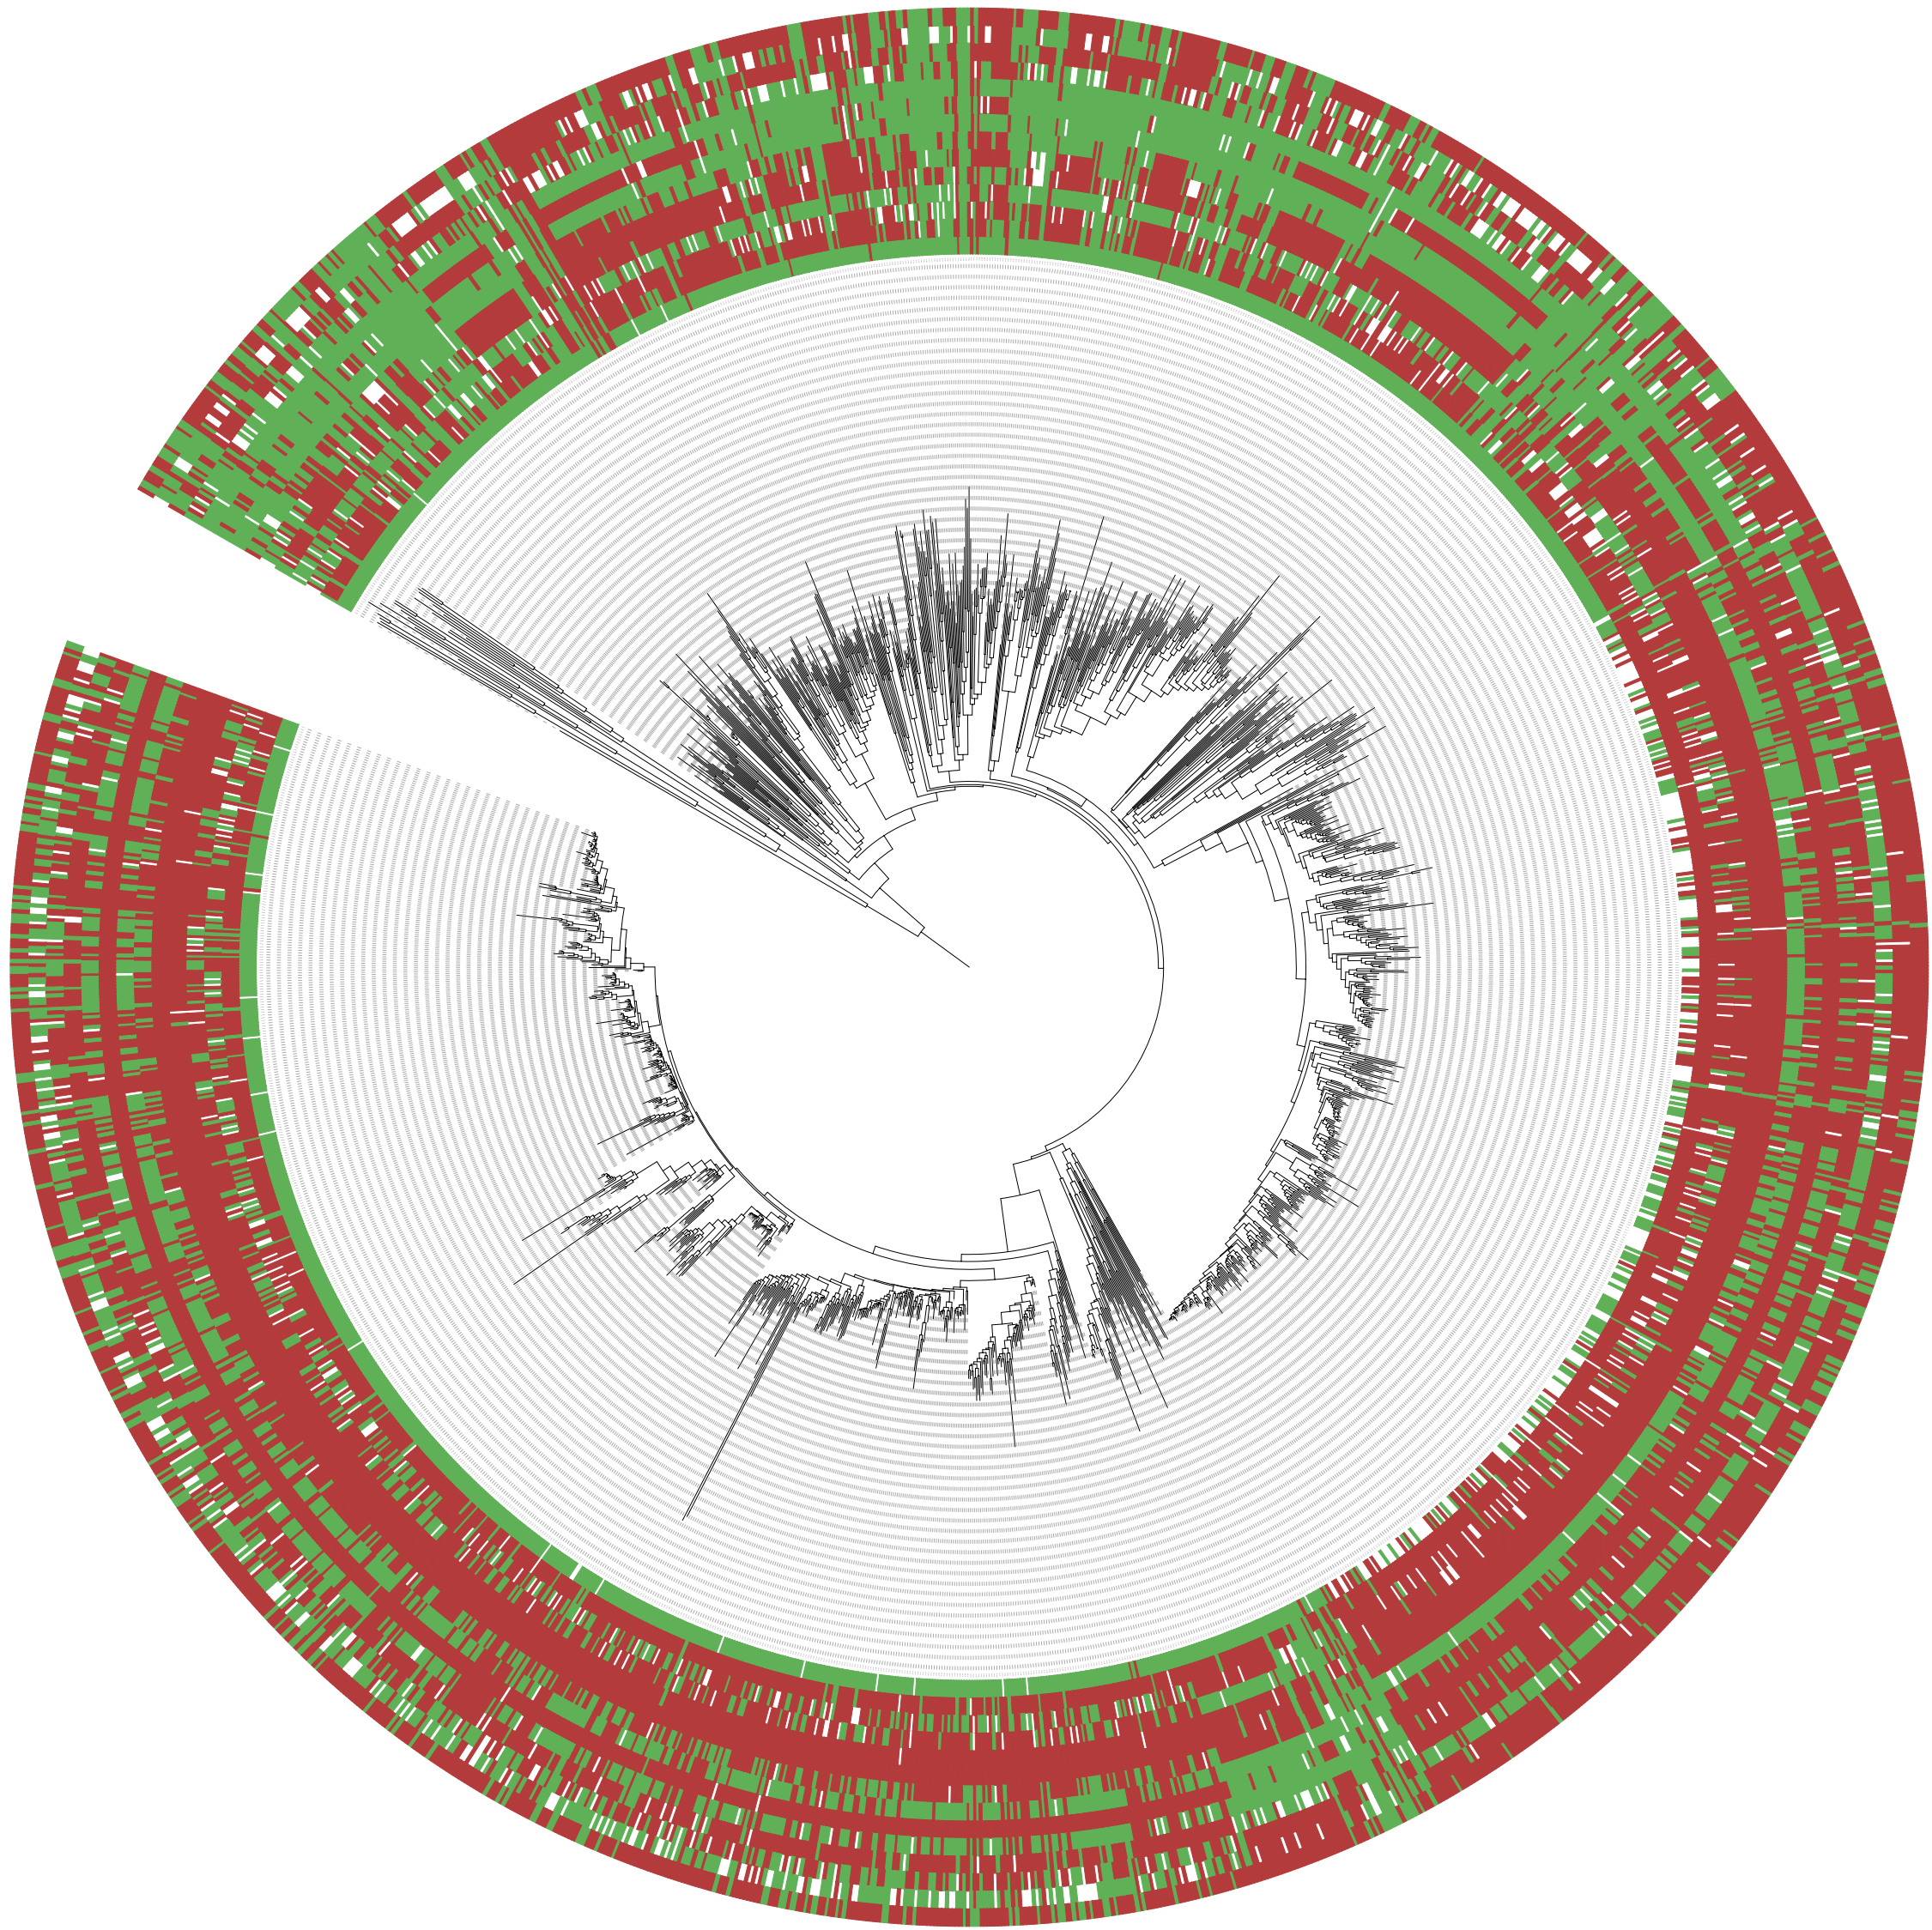

Supplement: msystems.00185-21-sf001.pdf [file msystems.00185-21-sf001.pdf]

# *M. tuberculosis*

Tree scale: 100000

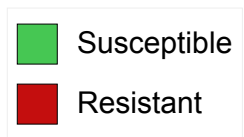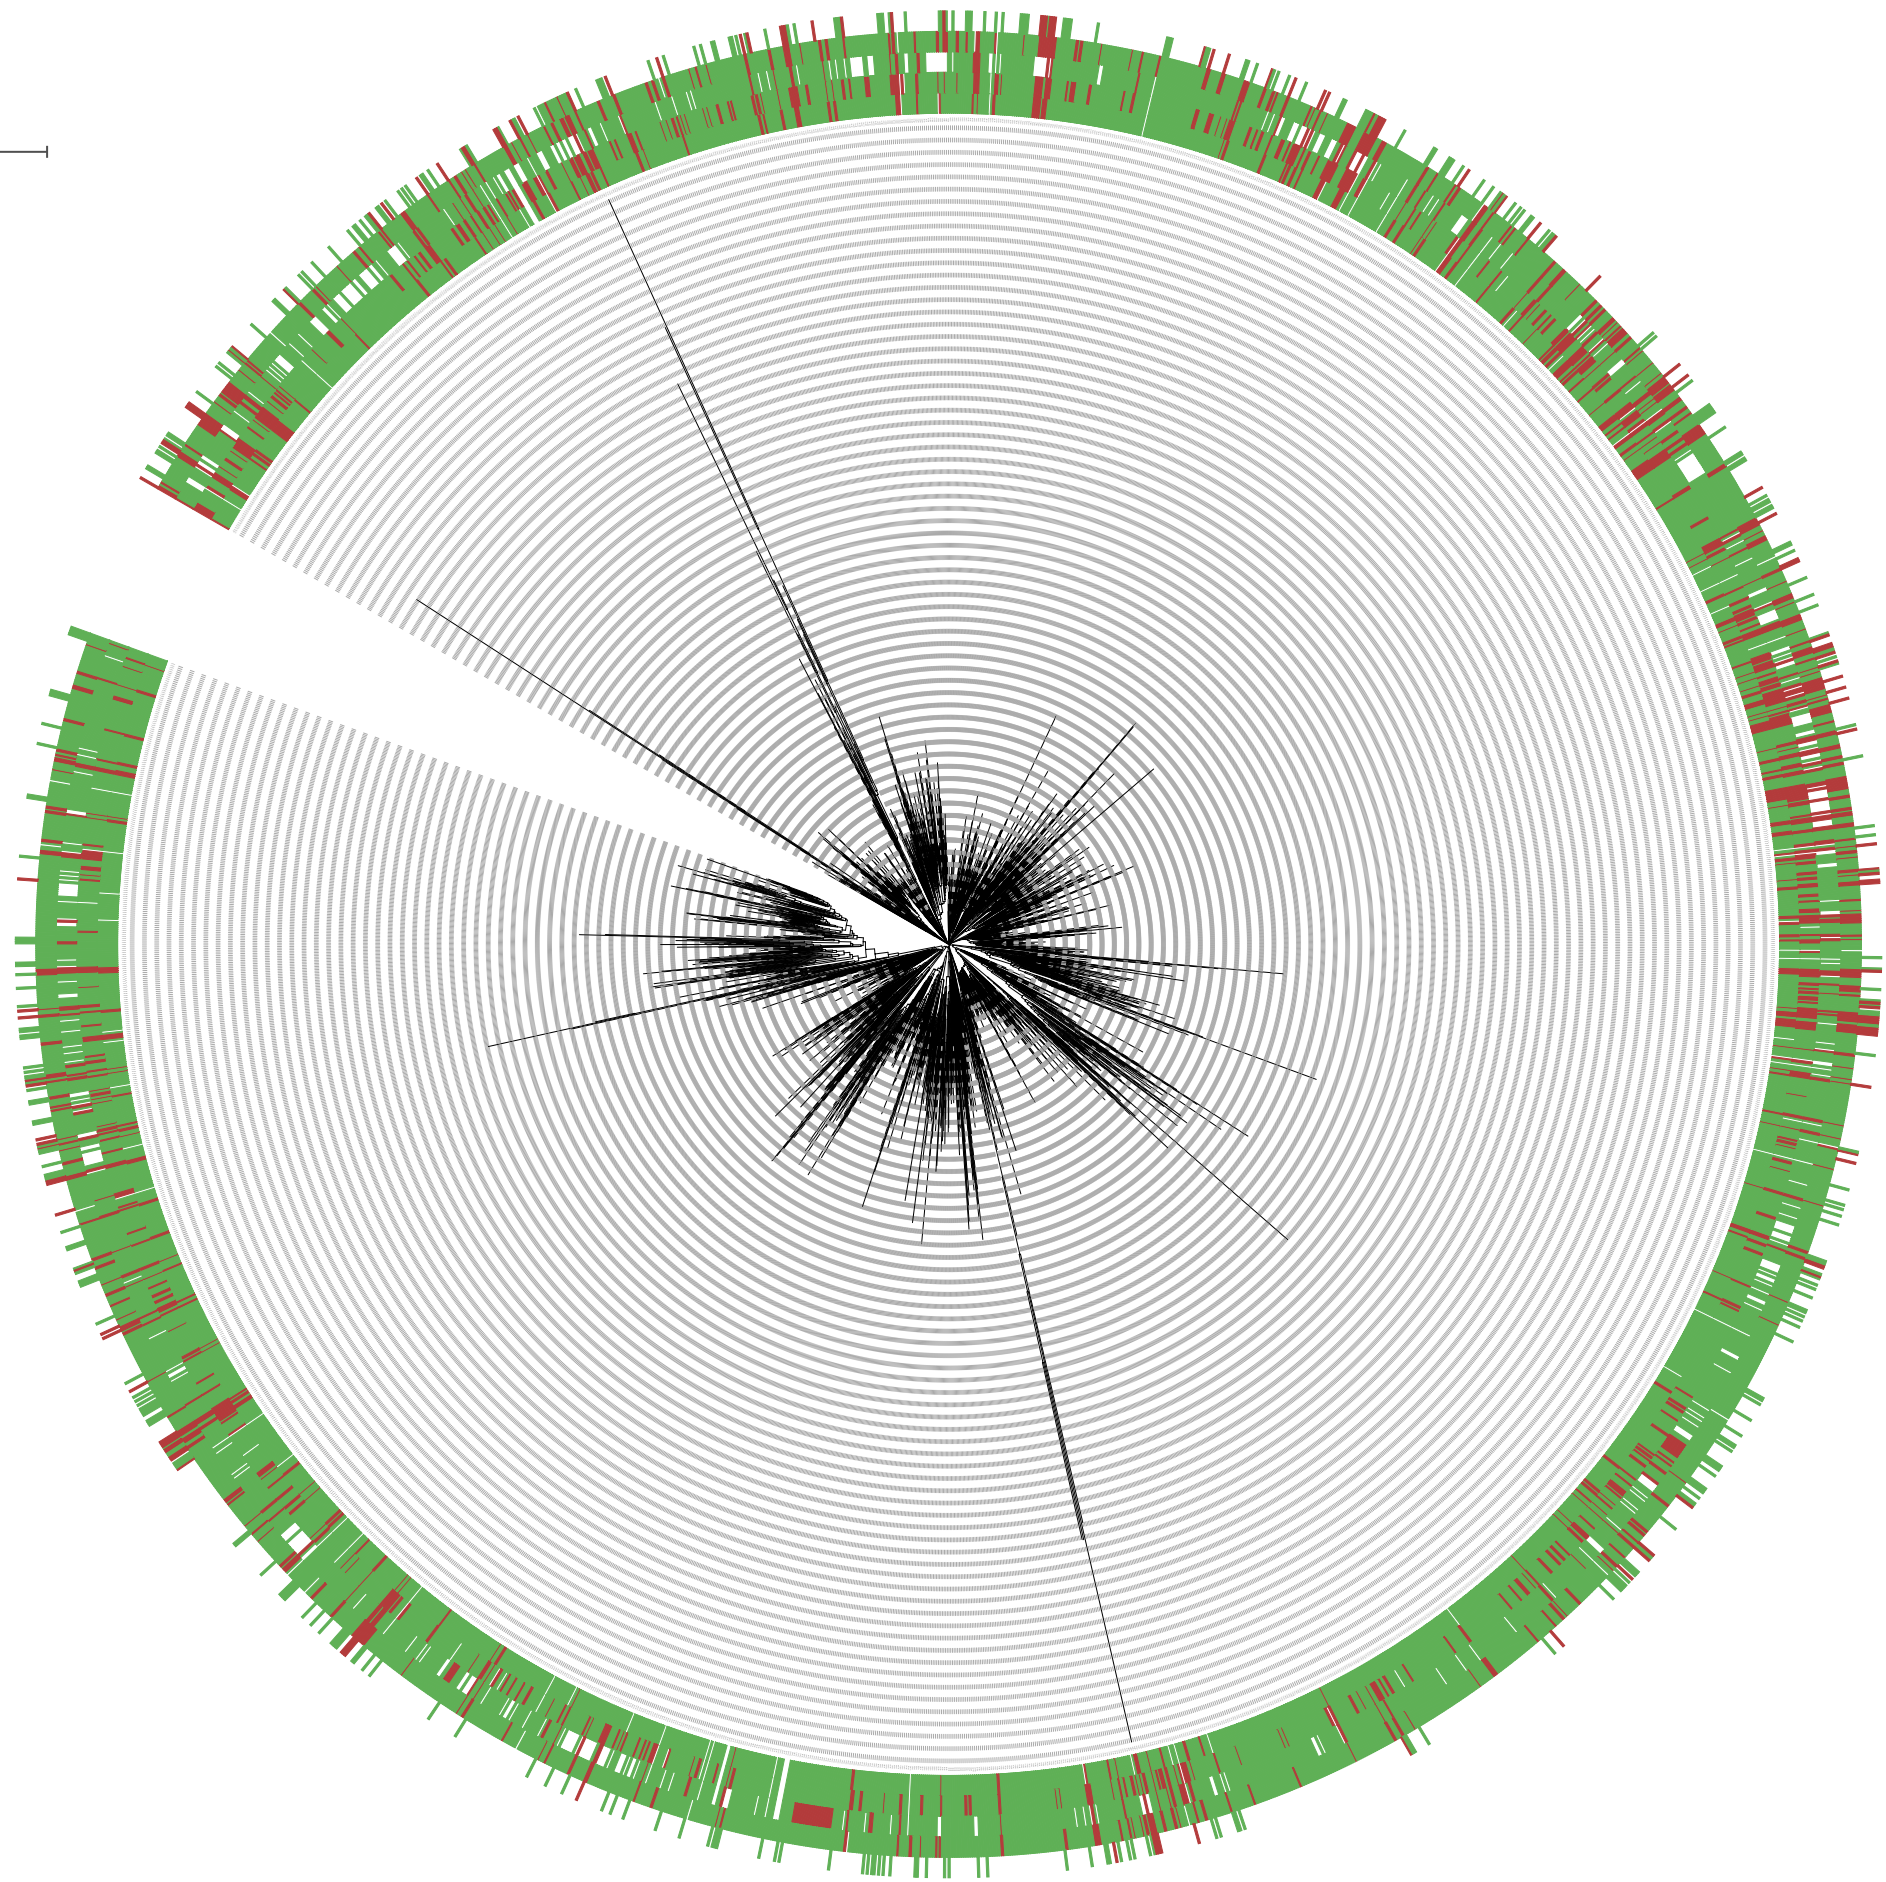

Supplement: msystems.00185-21-sf002.pdf [file msystems.00185-21-sf002.pdf]

# *S. enterica*

Tree scale: 100000

 Susceptible  
 Resistant

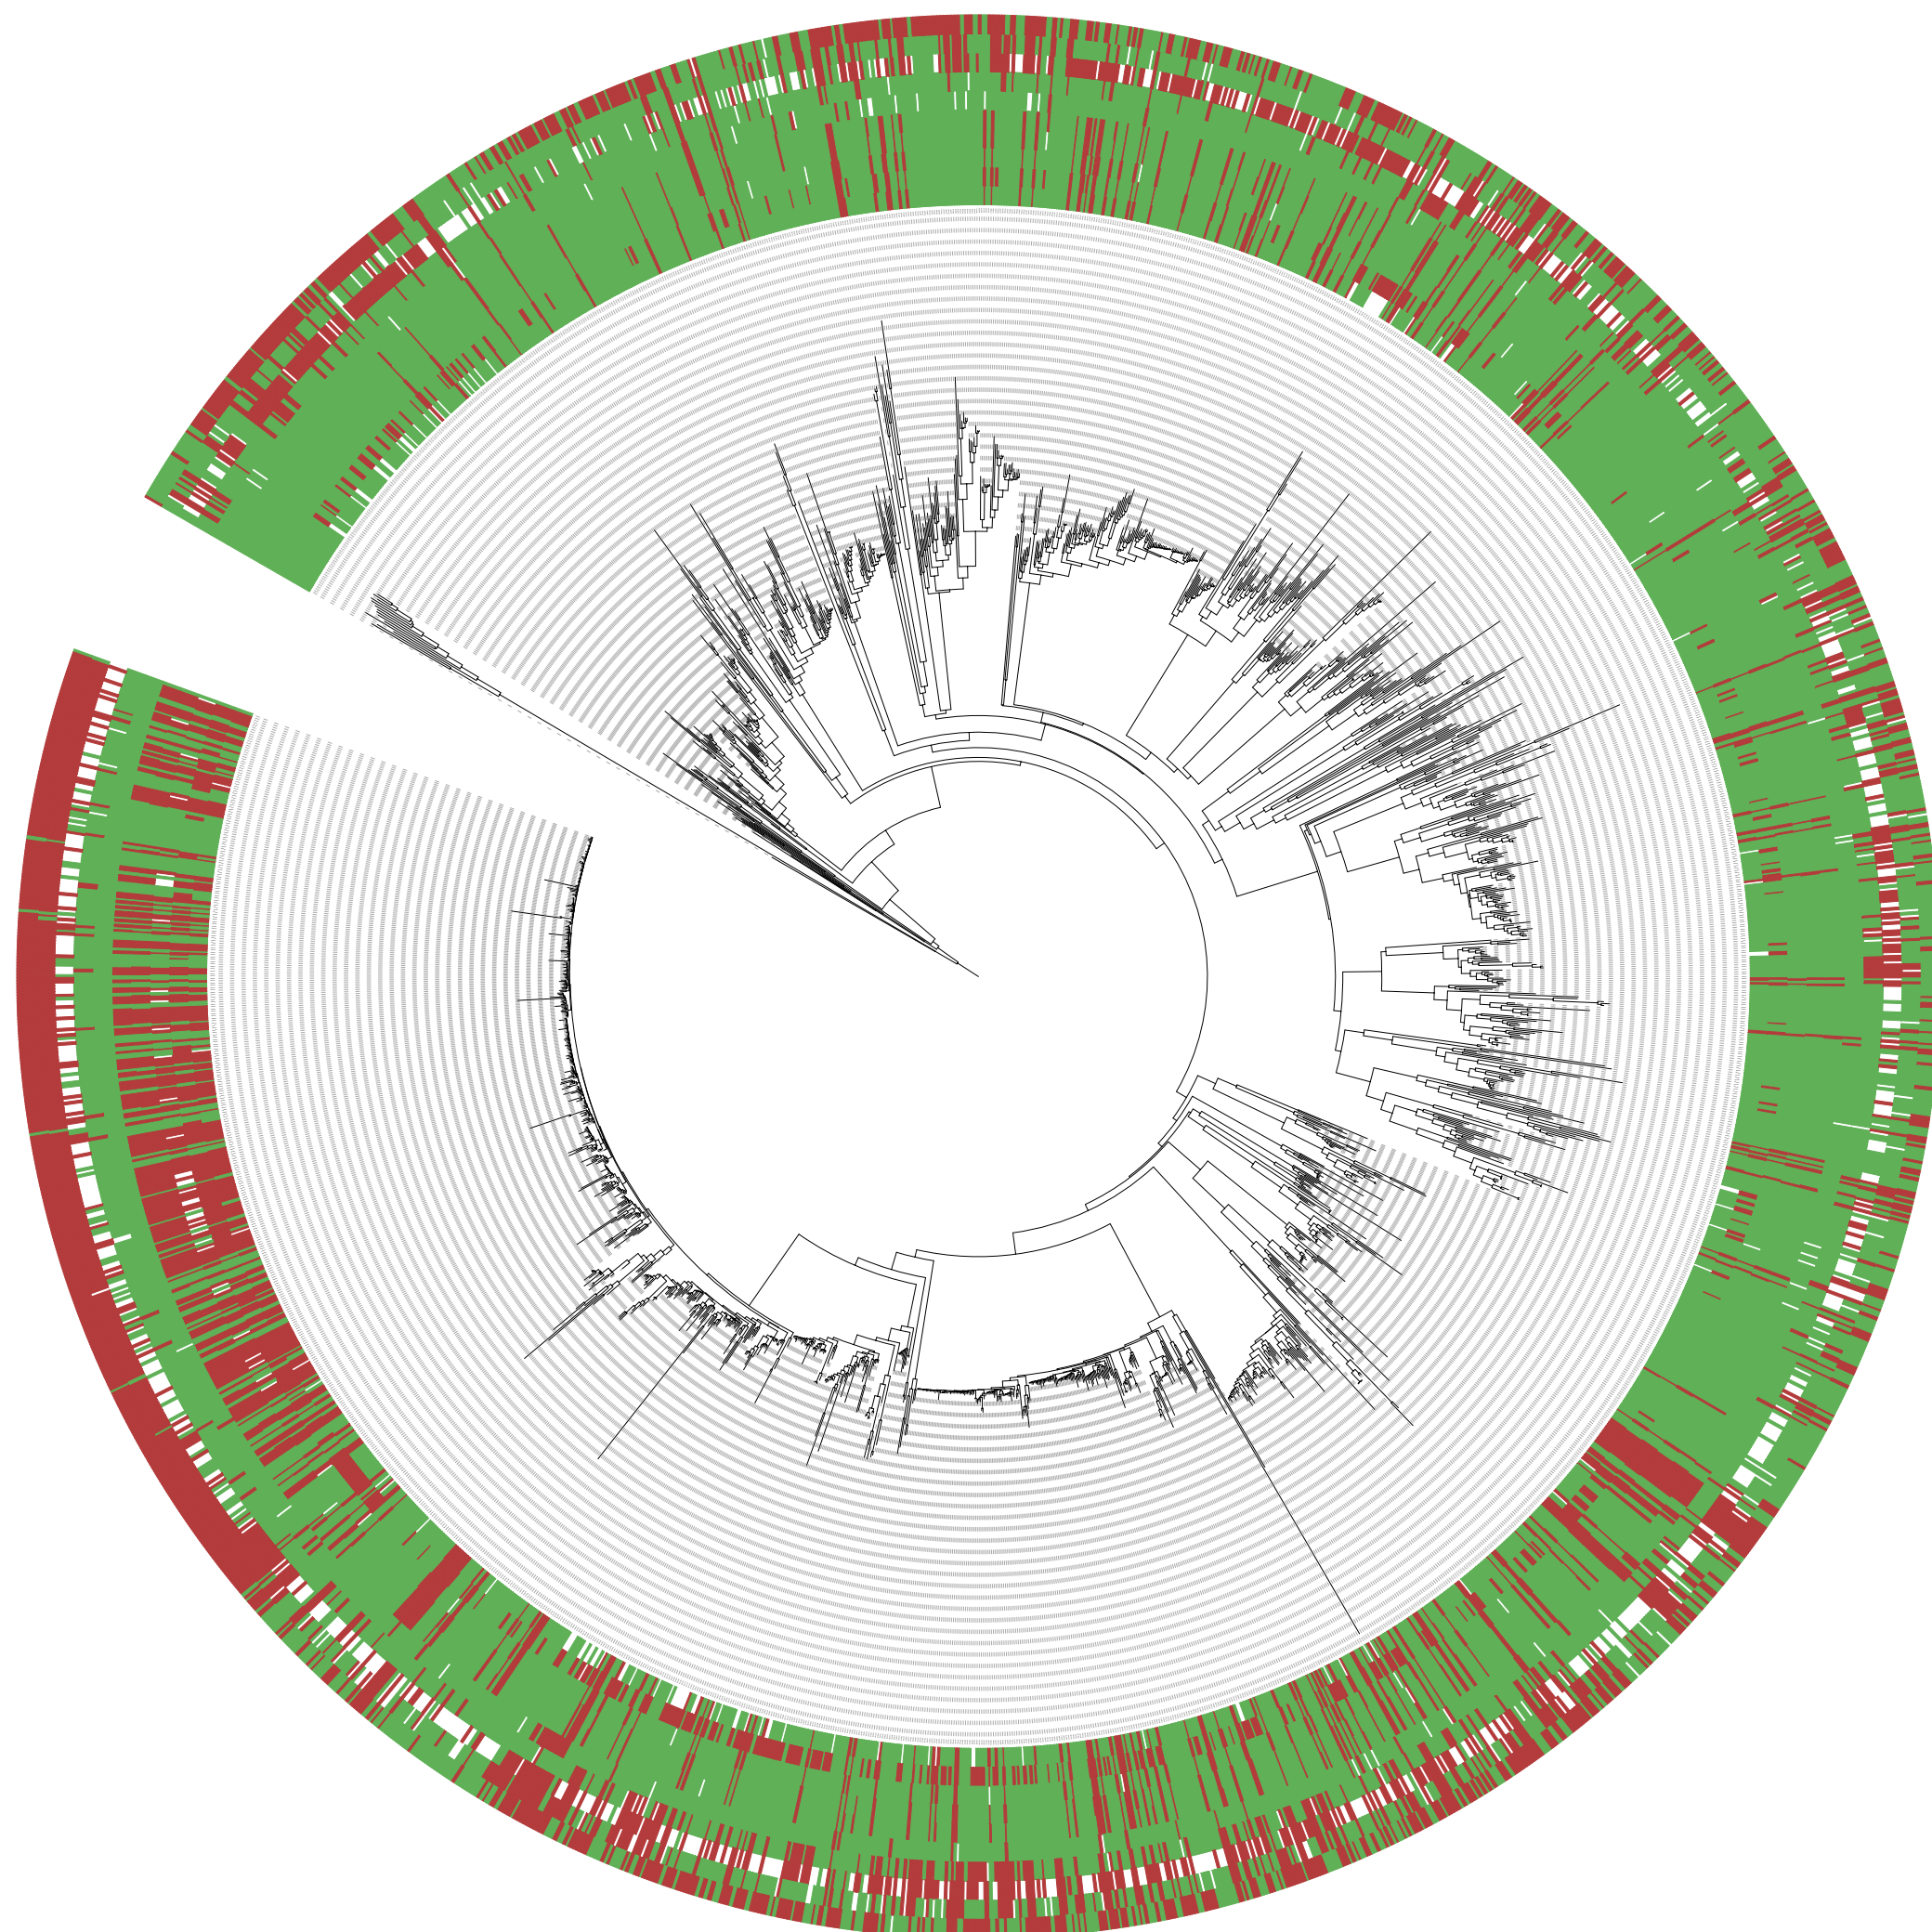

Supplement: msystems.00185-21-sf003.pdf [file msystems.00185-21-sf003.pdf]

*K. pneumoniae*

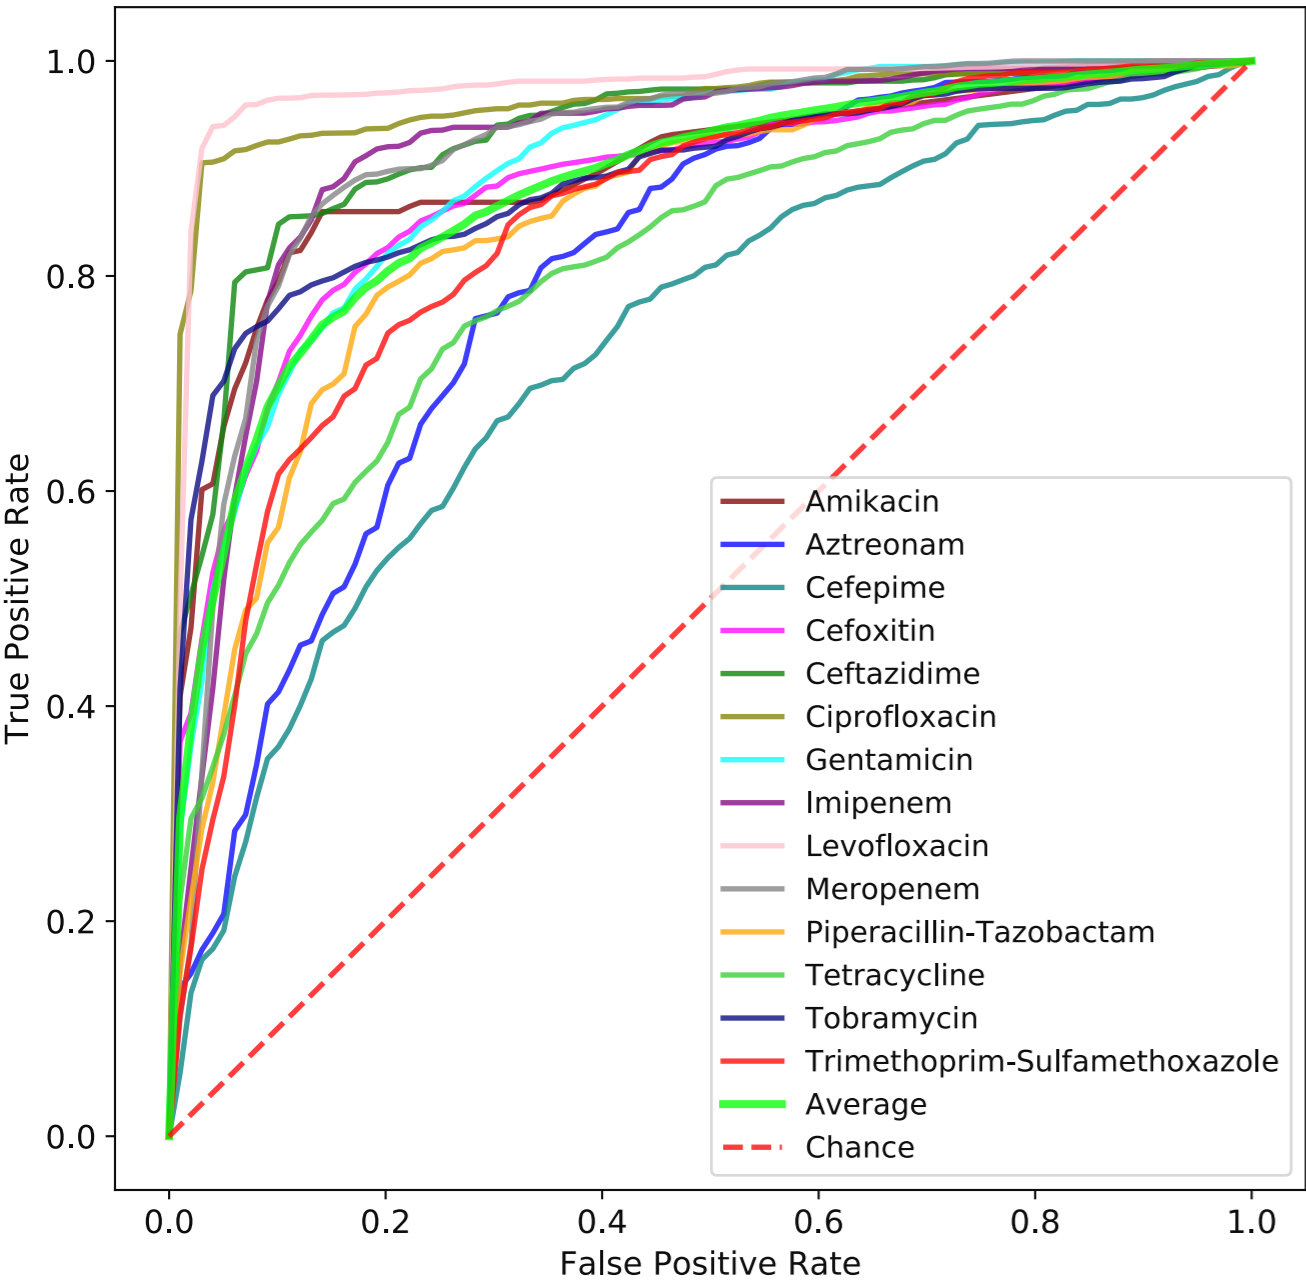

*M. tuberculosis*

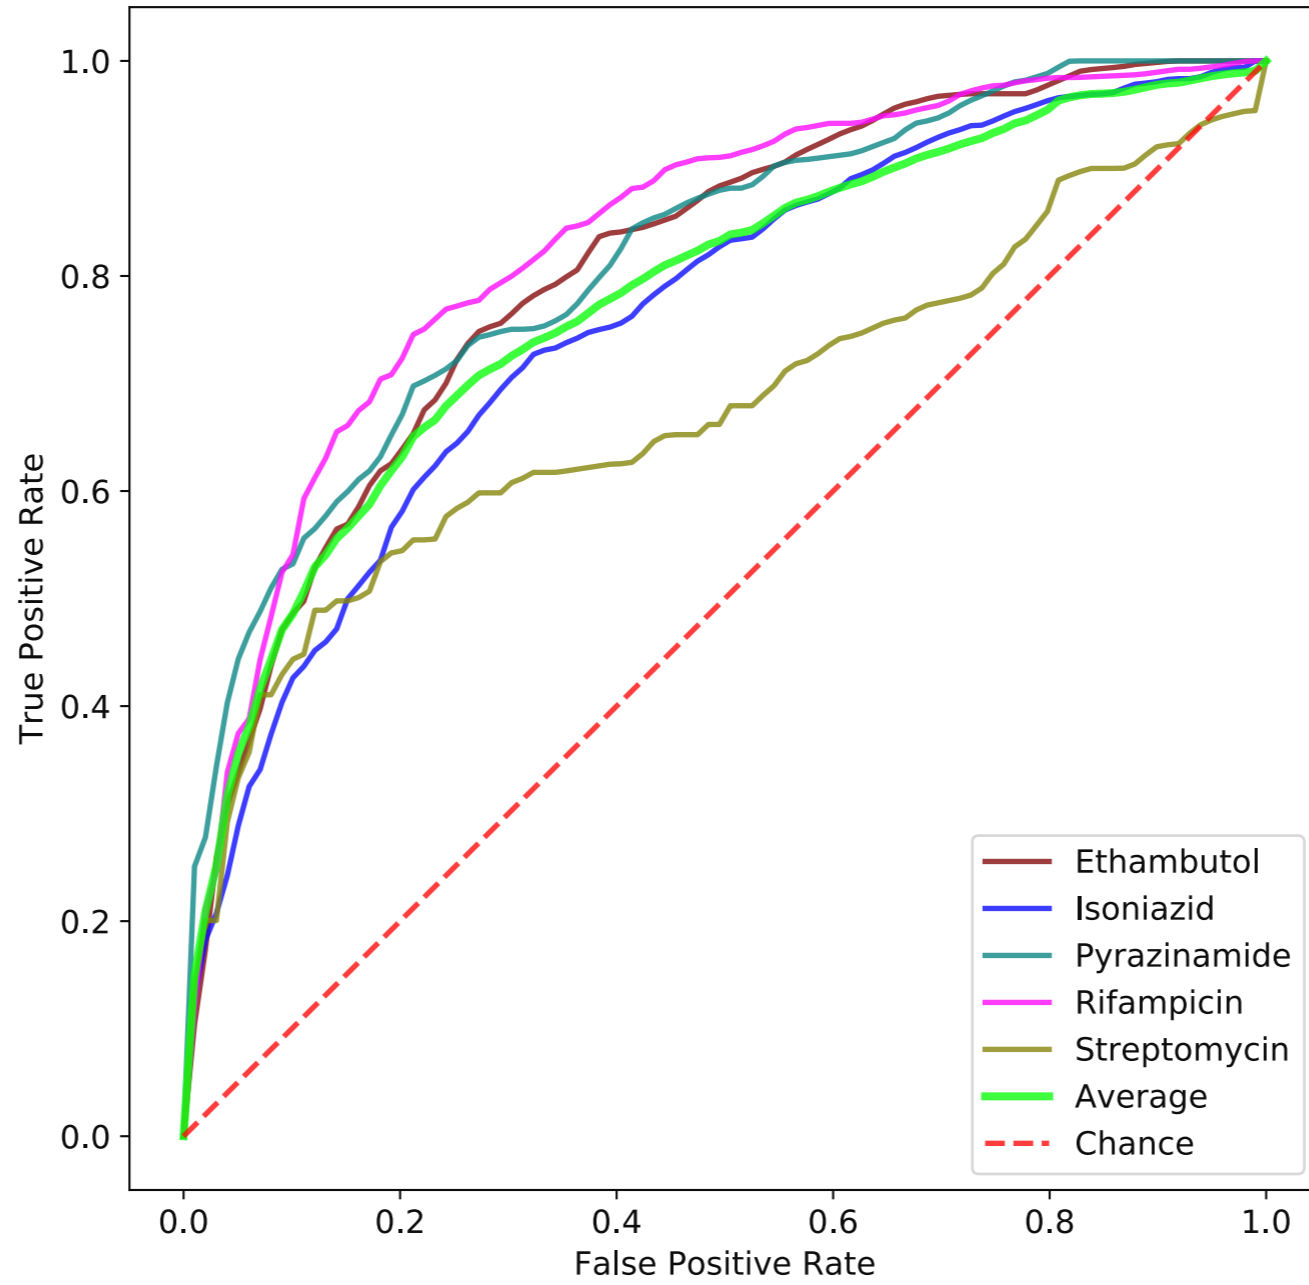

*S. enterica*

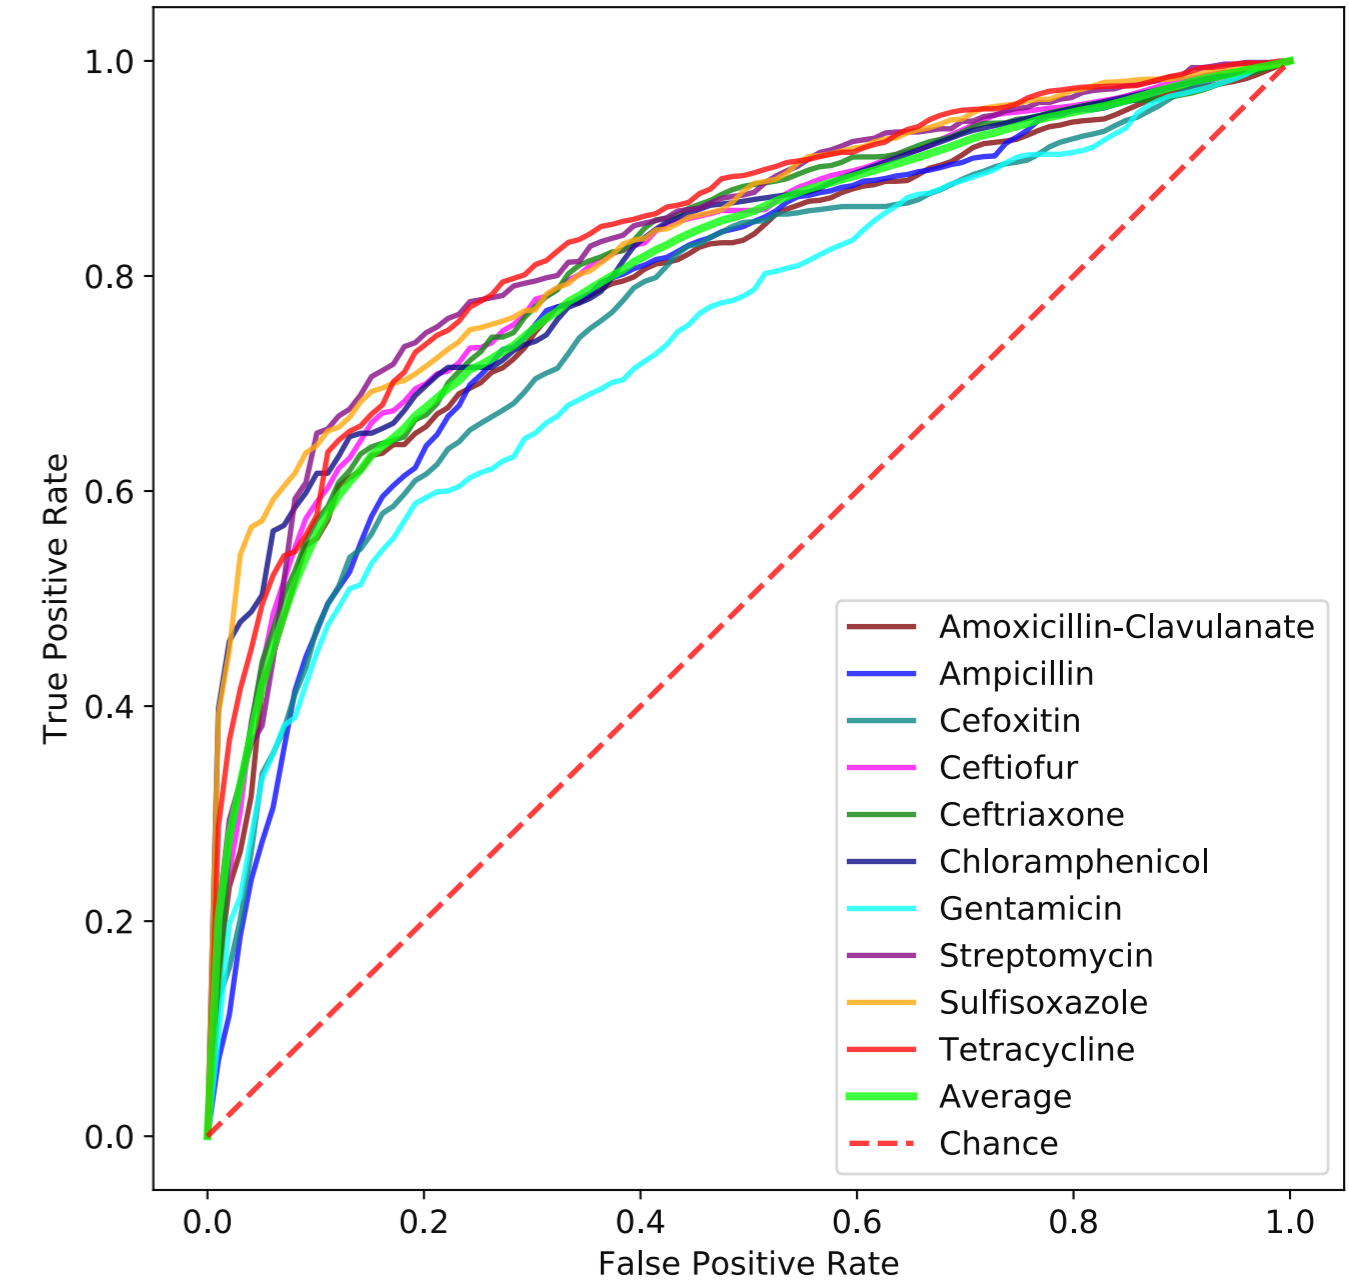

*K. pneumoniae*

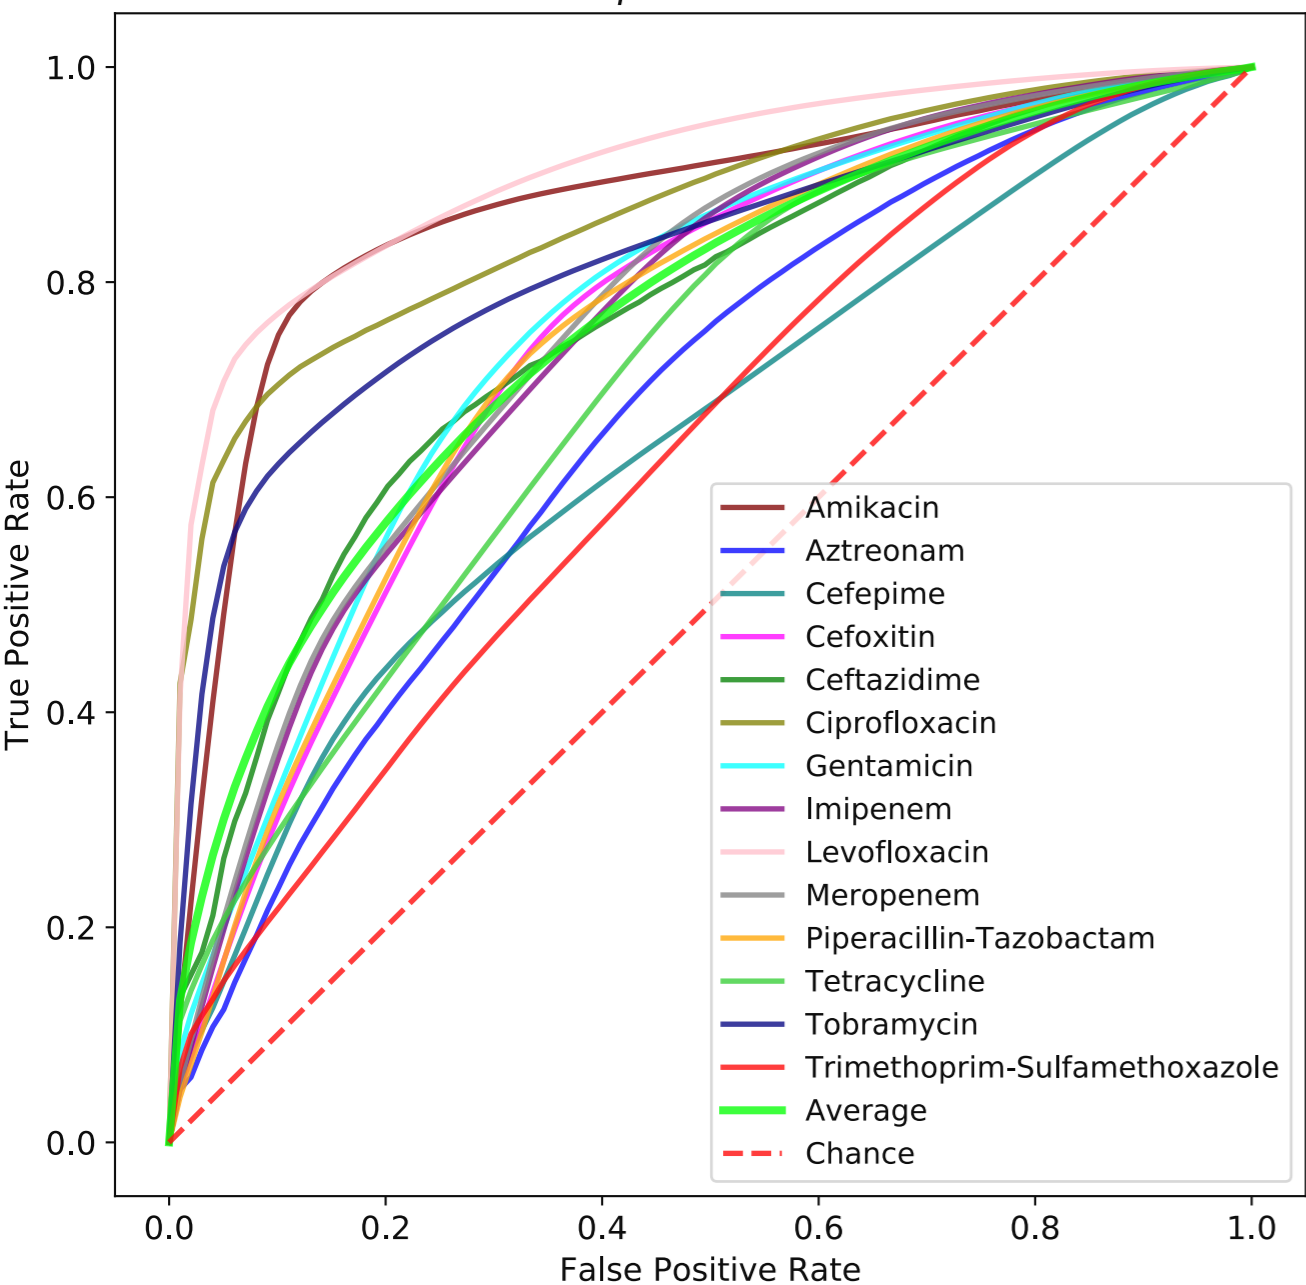

*M. tuberculosis*

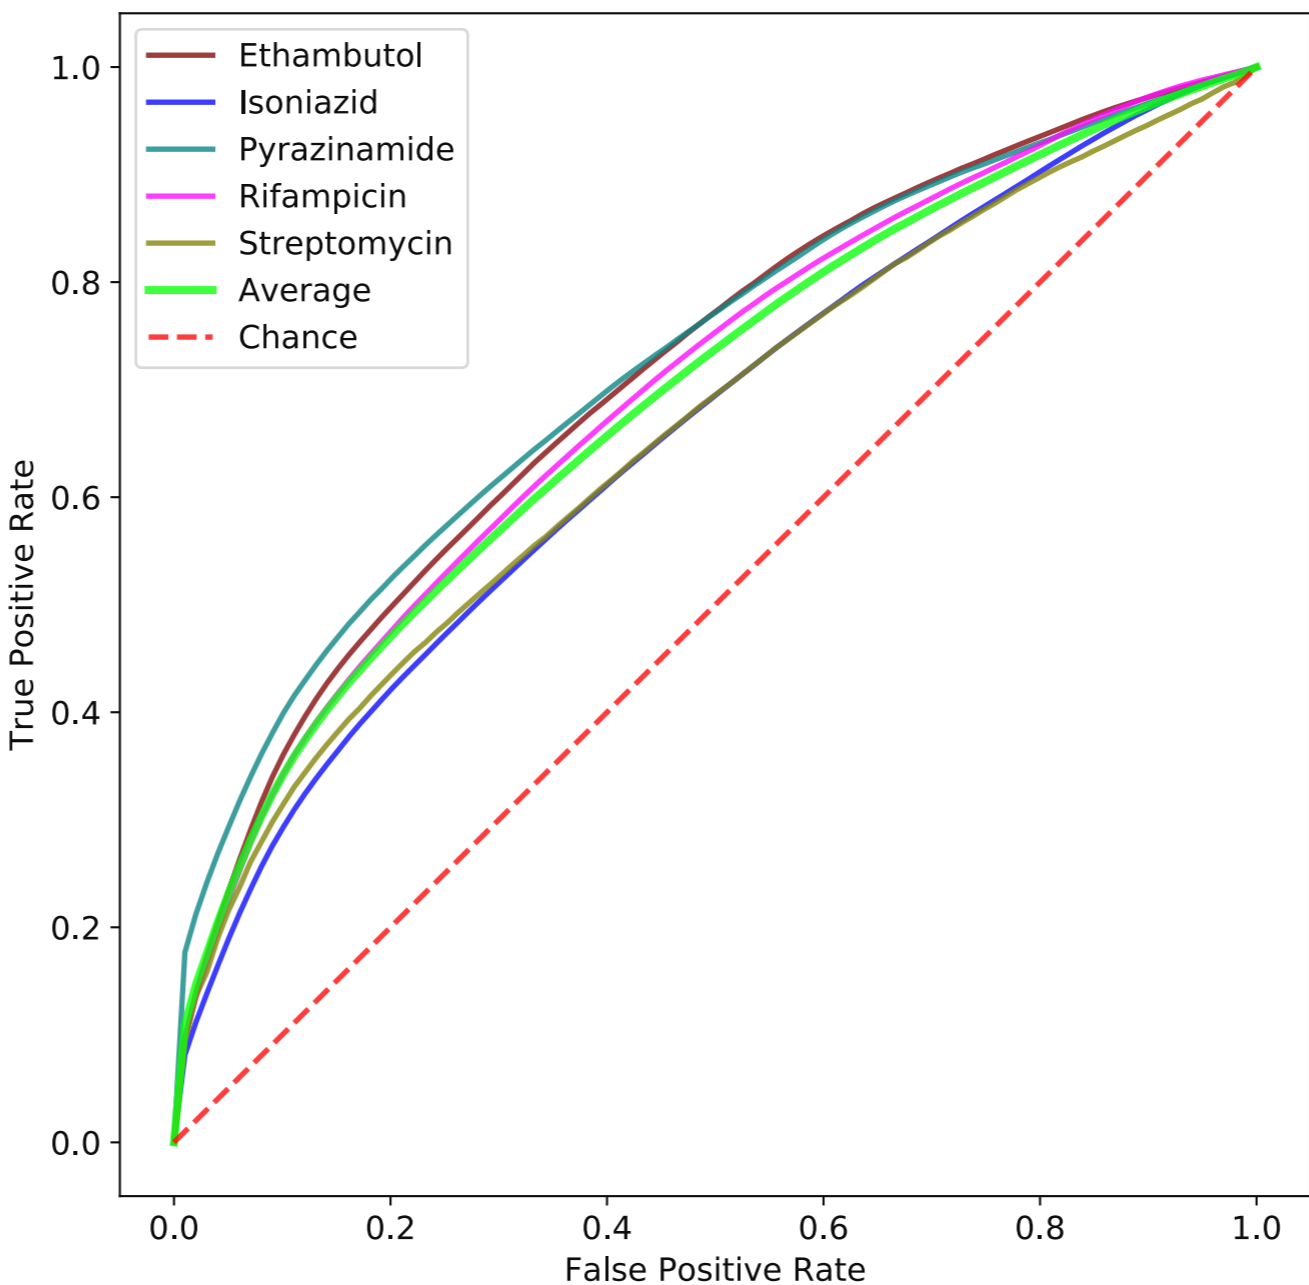

*S. enterica*

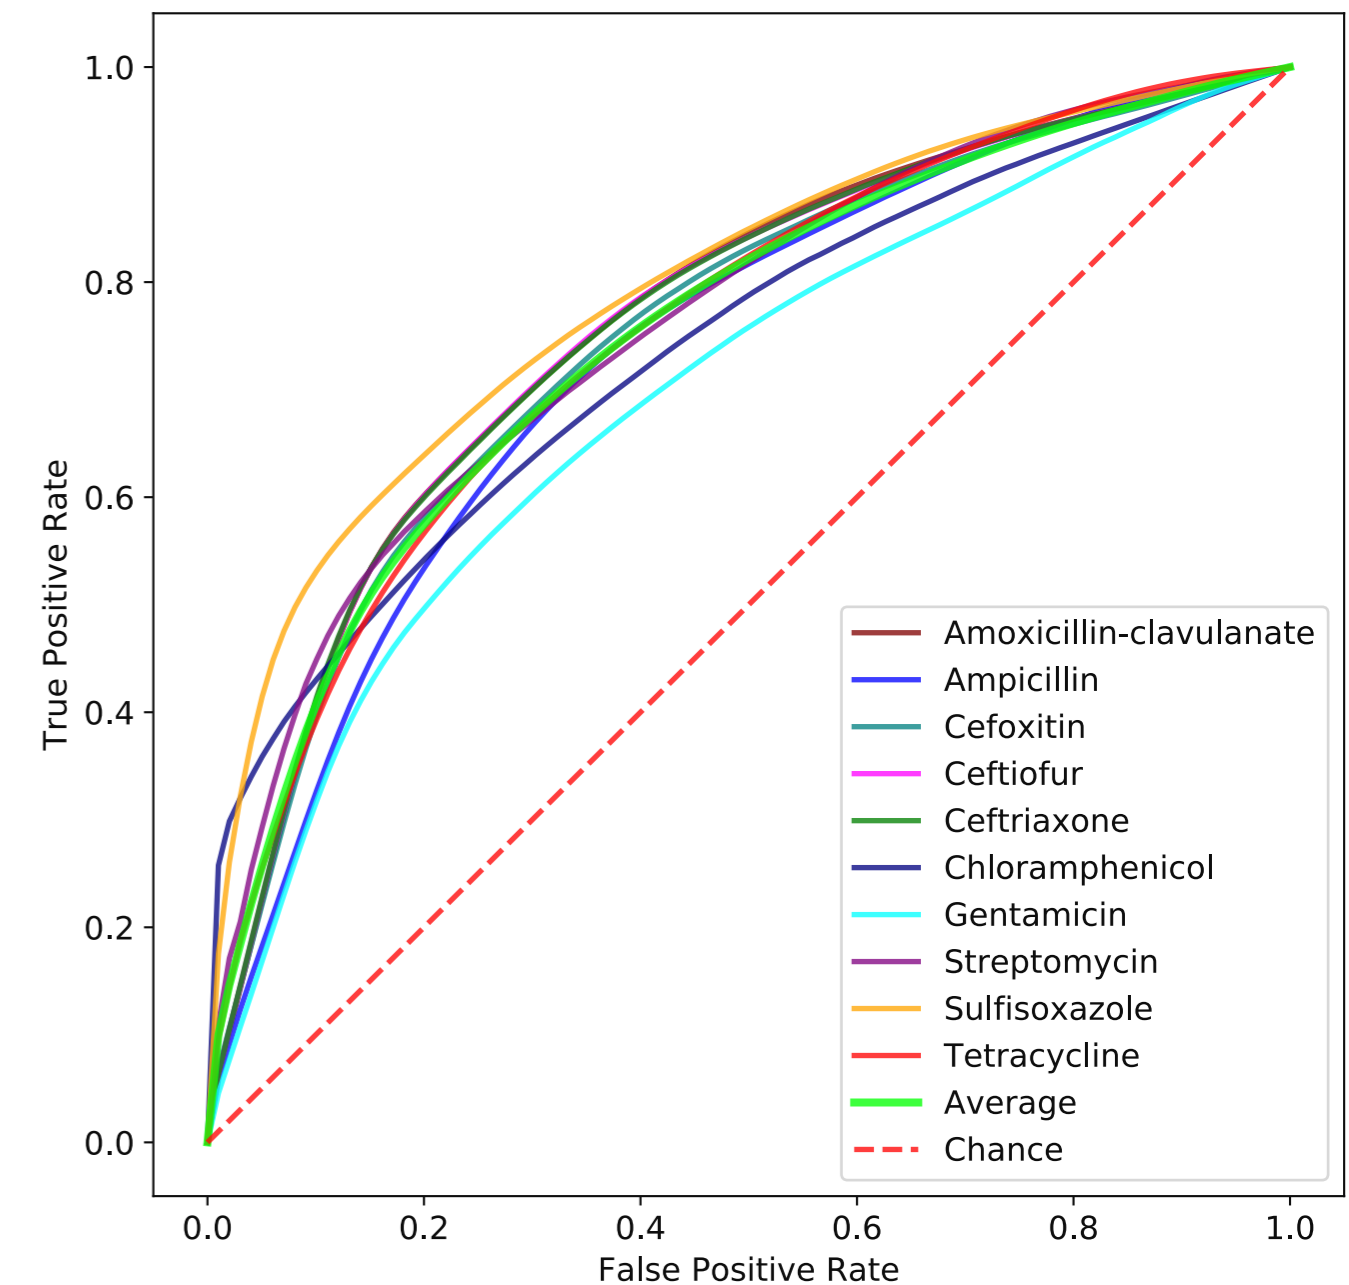

Supplement: msystems.00185-21-sf004.pdf [file msystems.00185-21-sf004.pdf]

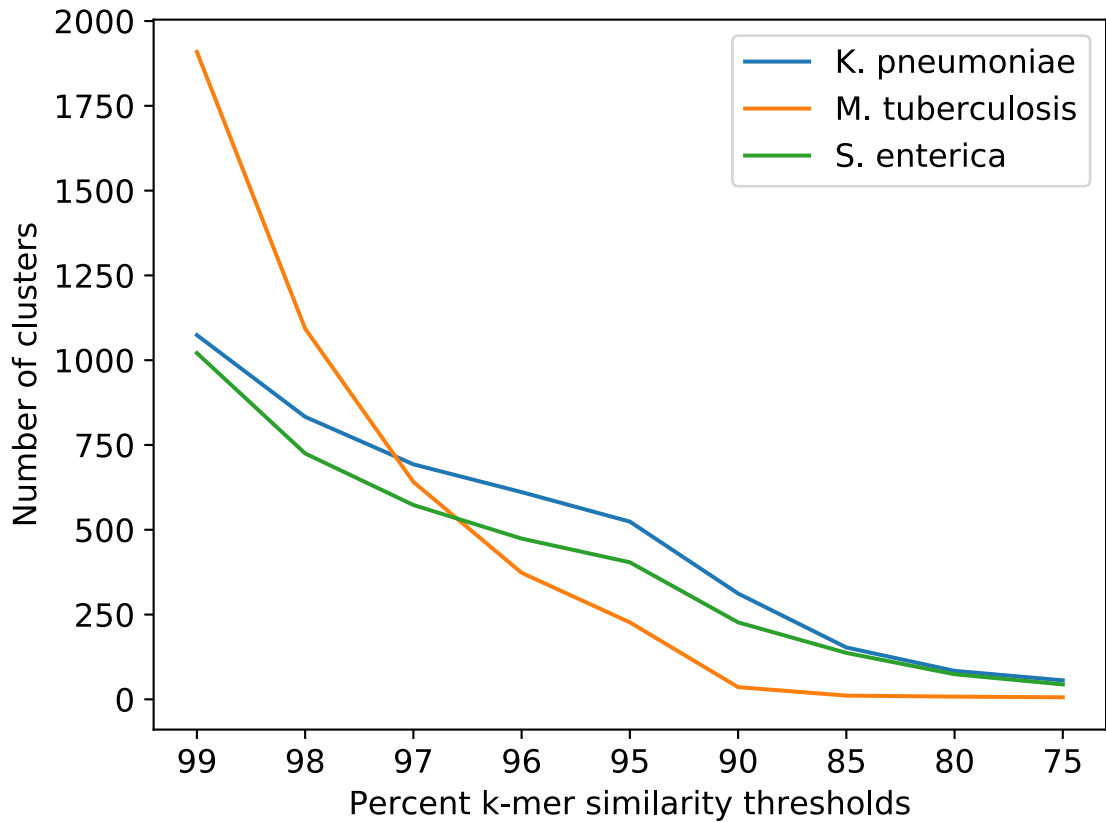

Supplement: msystems.00185-21-sf006.pdf [file msystems.00185-21-sf006.pdf]

*K. pneumoniae*

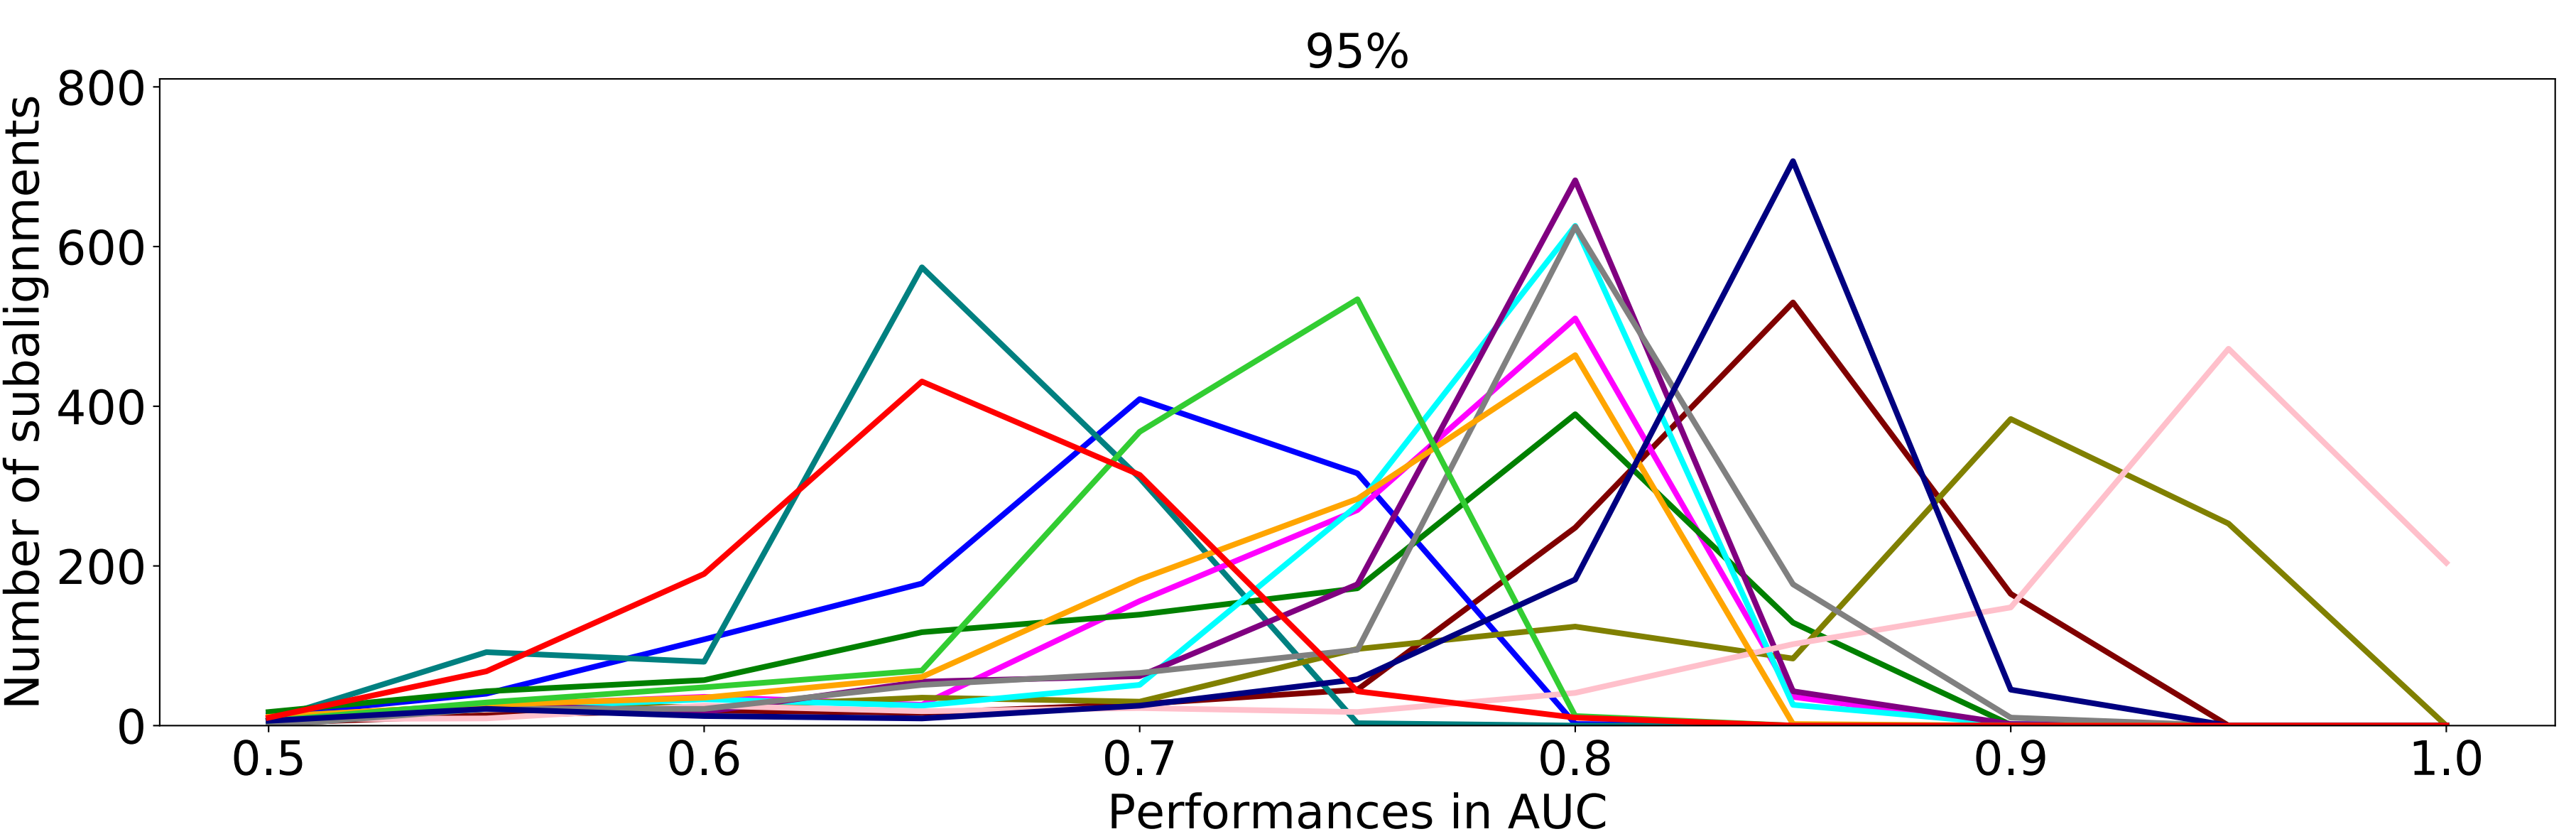

*M. tuberculosis*

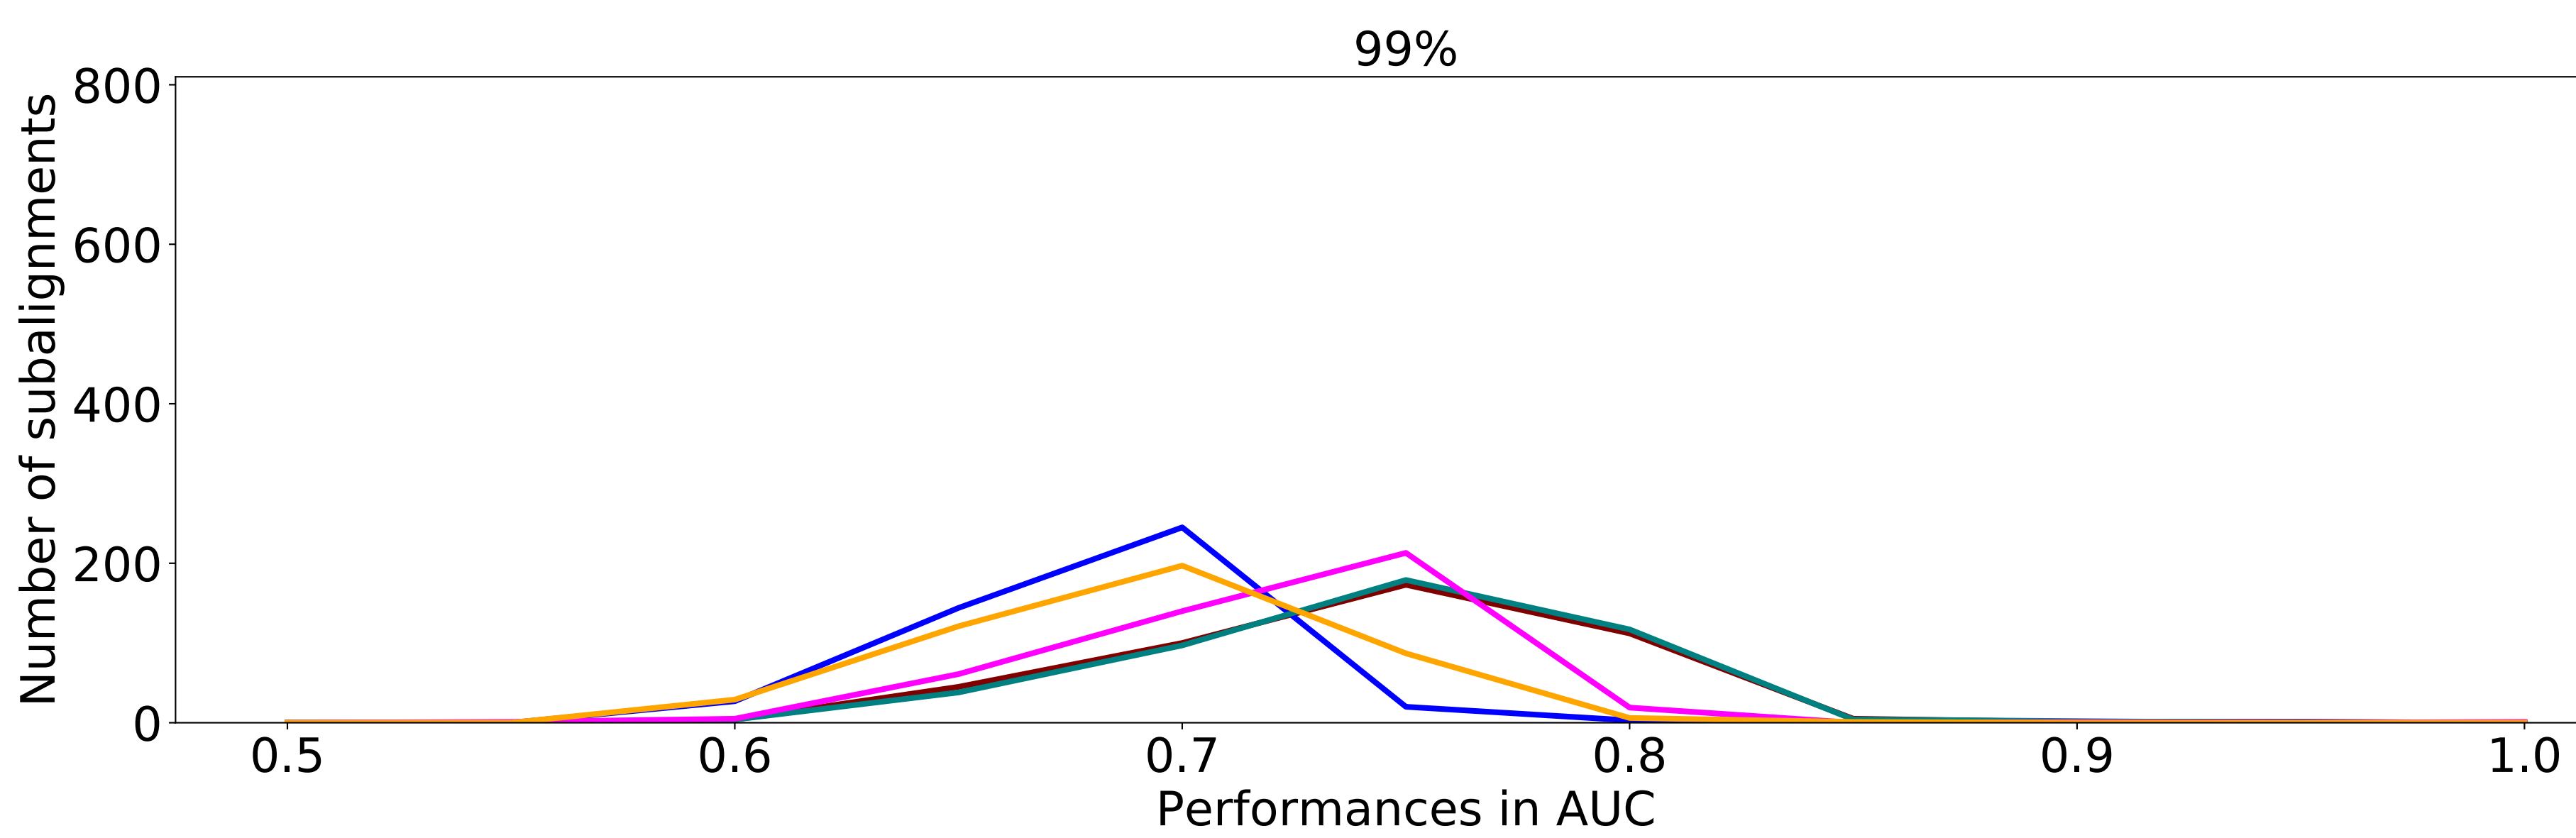

*S. enterica*

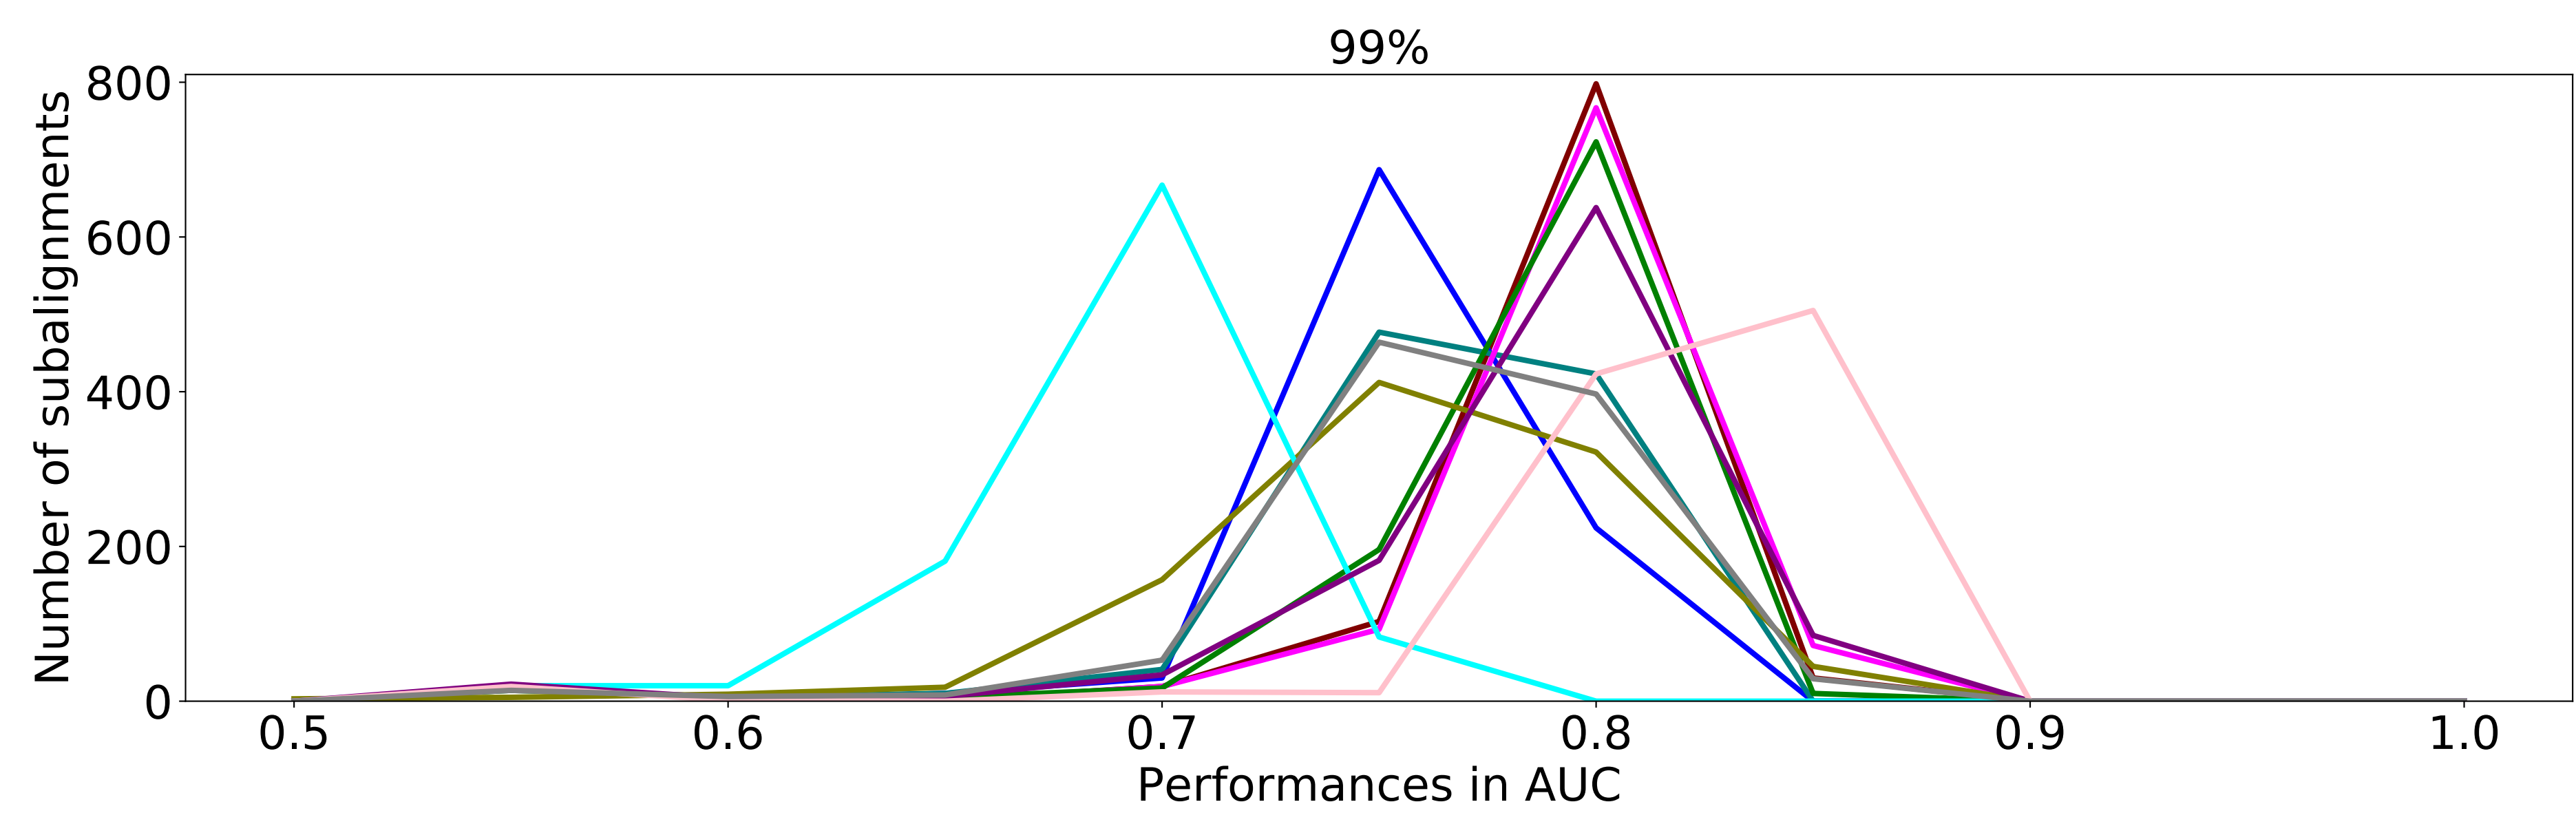

85%

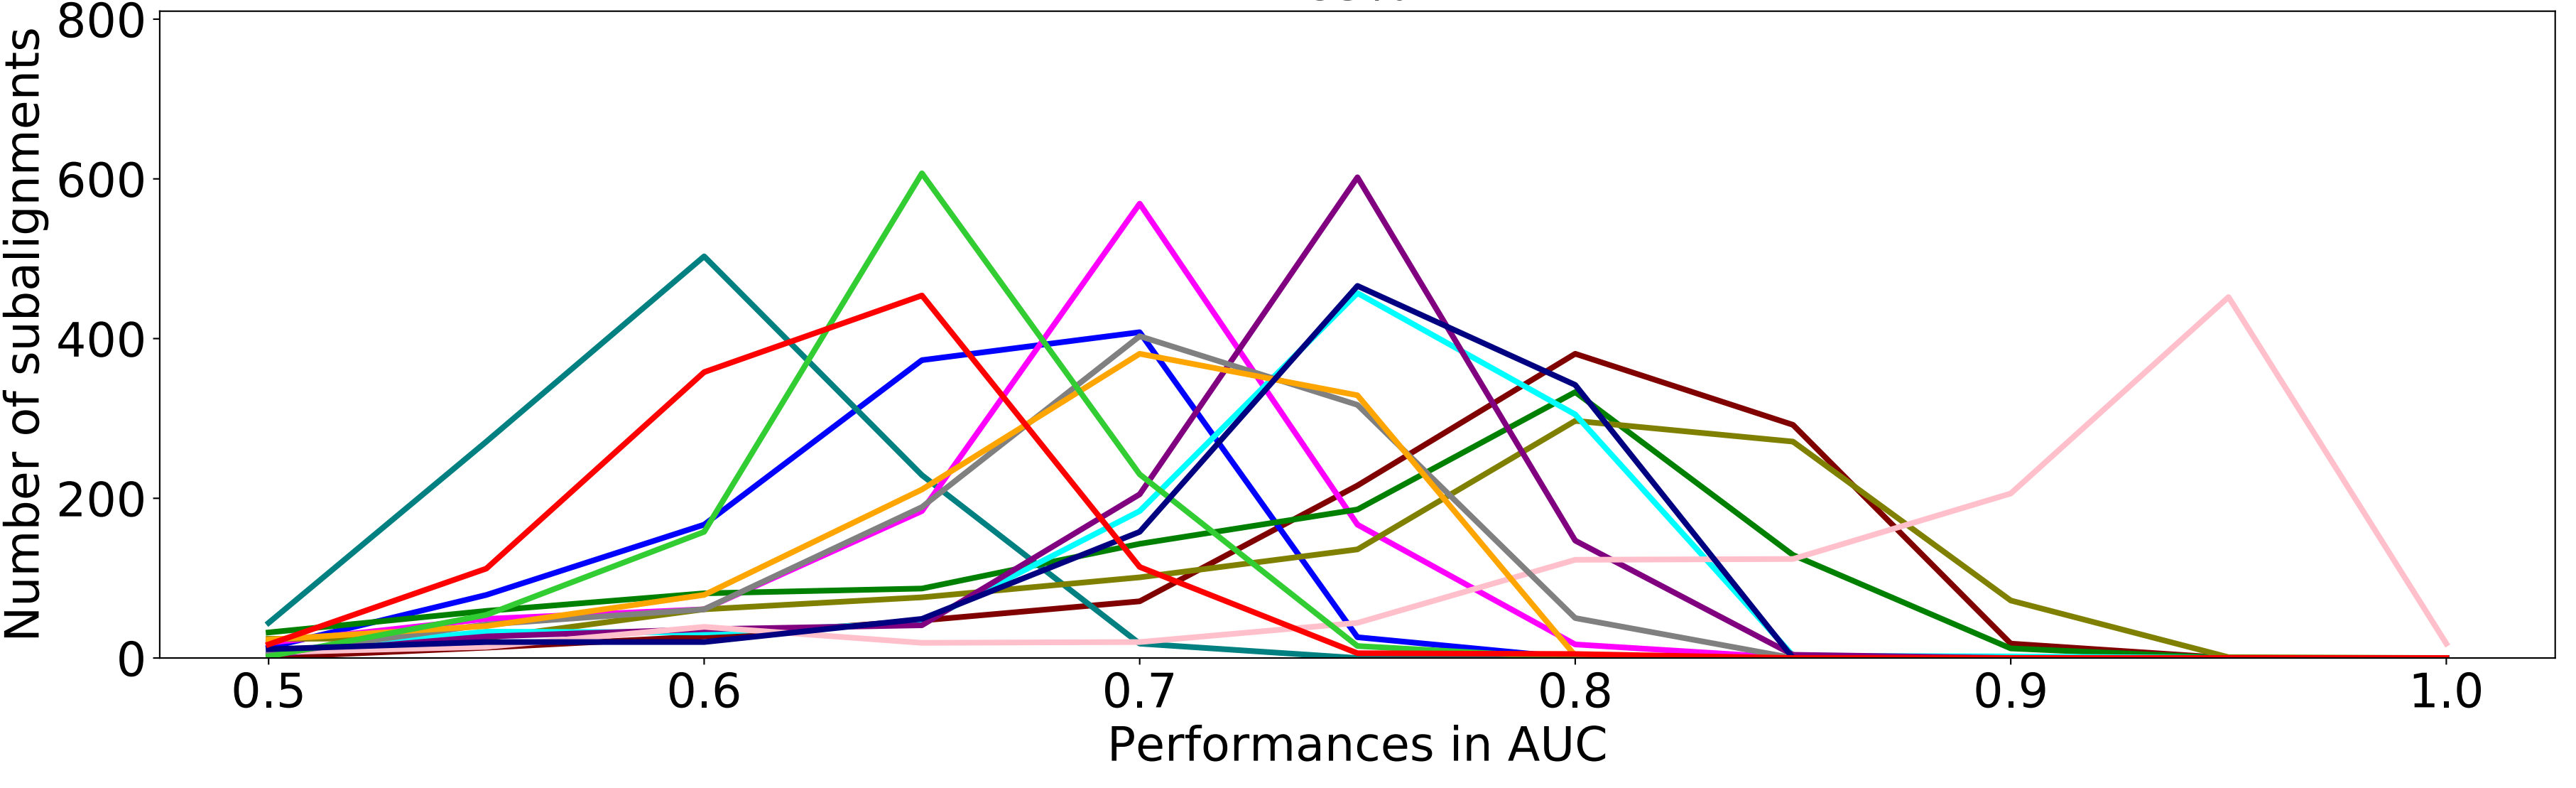

97%

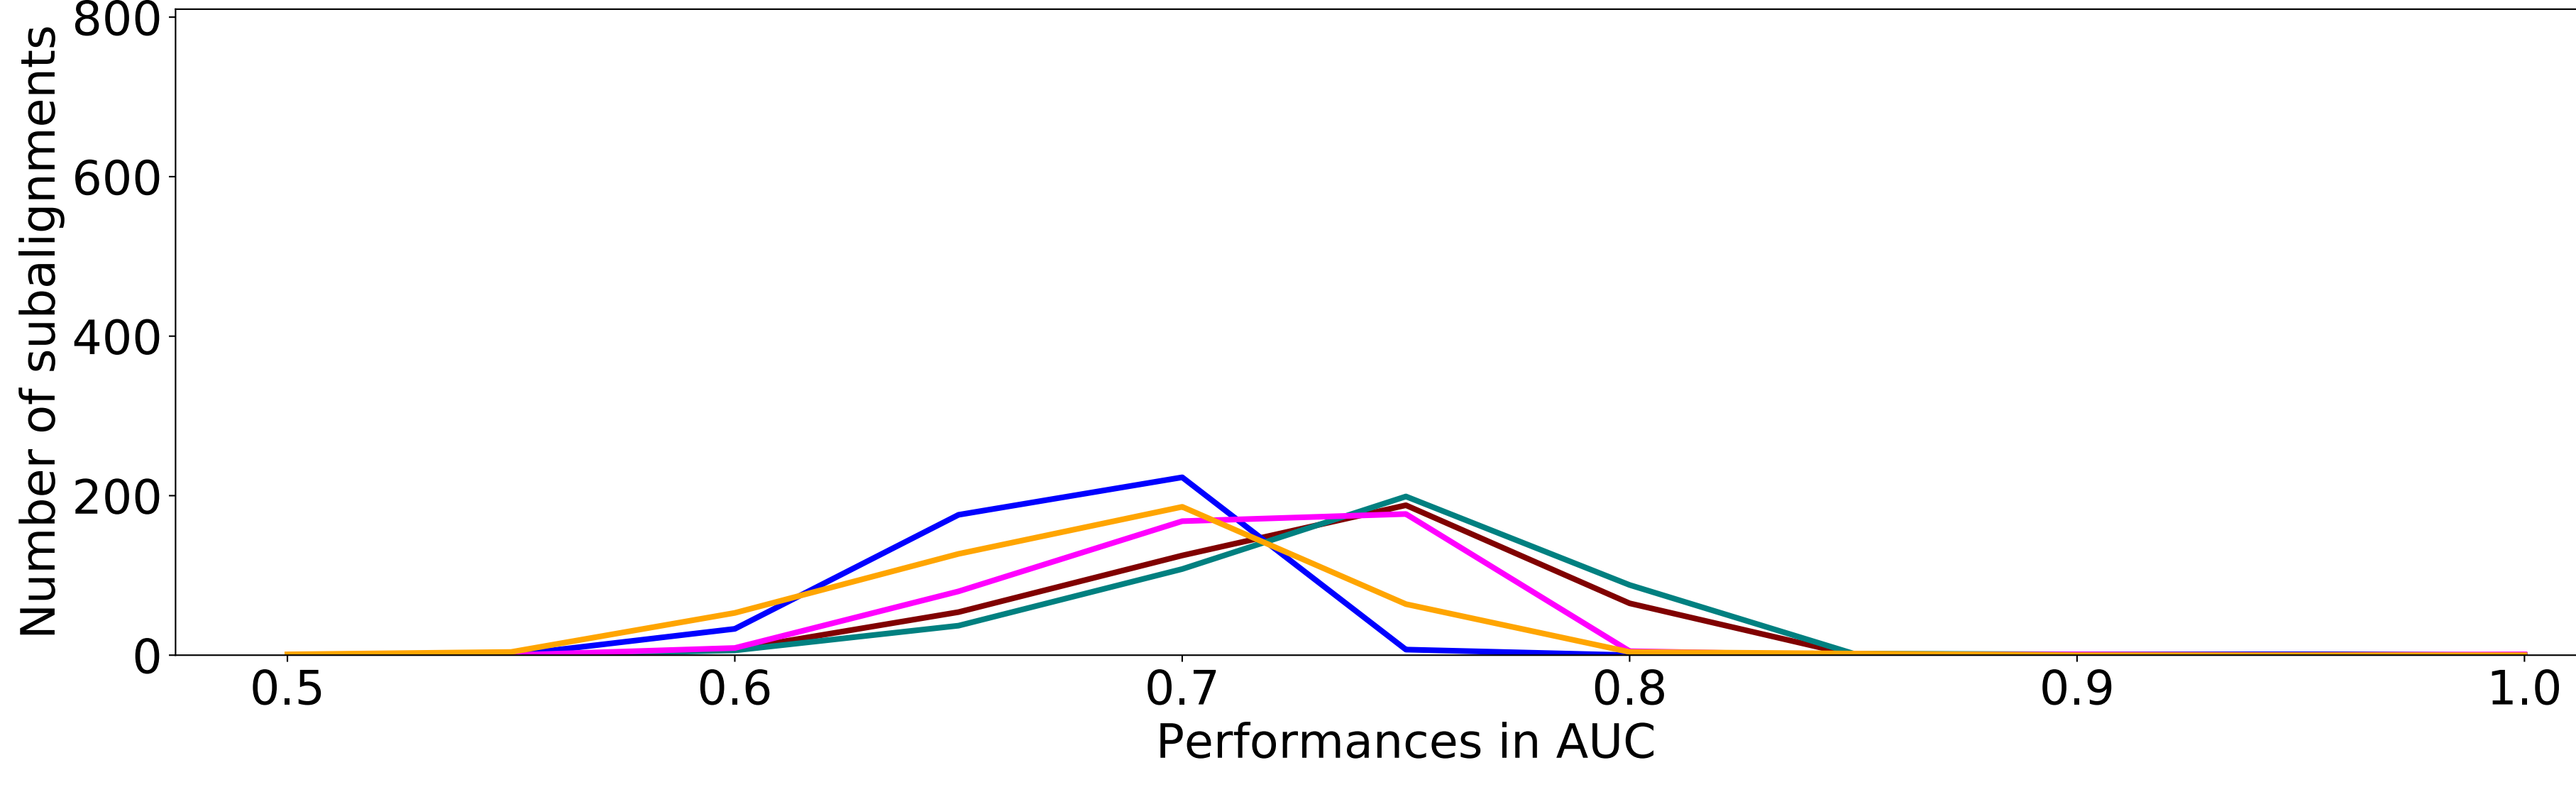

97%

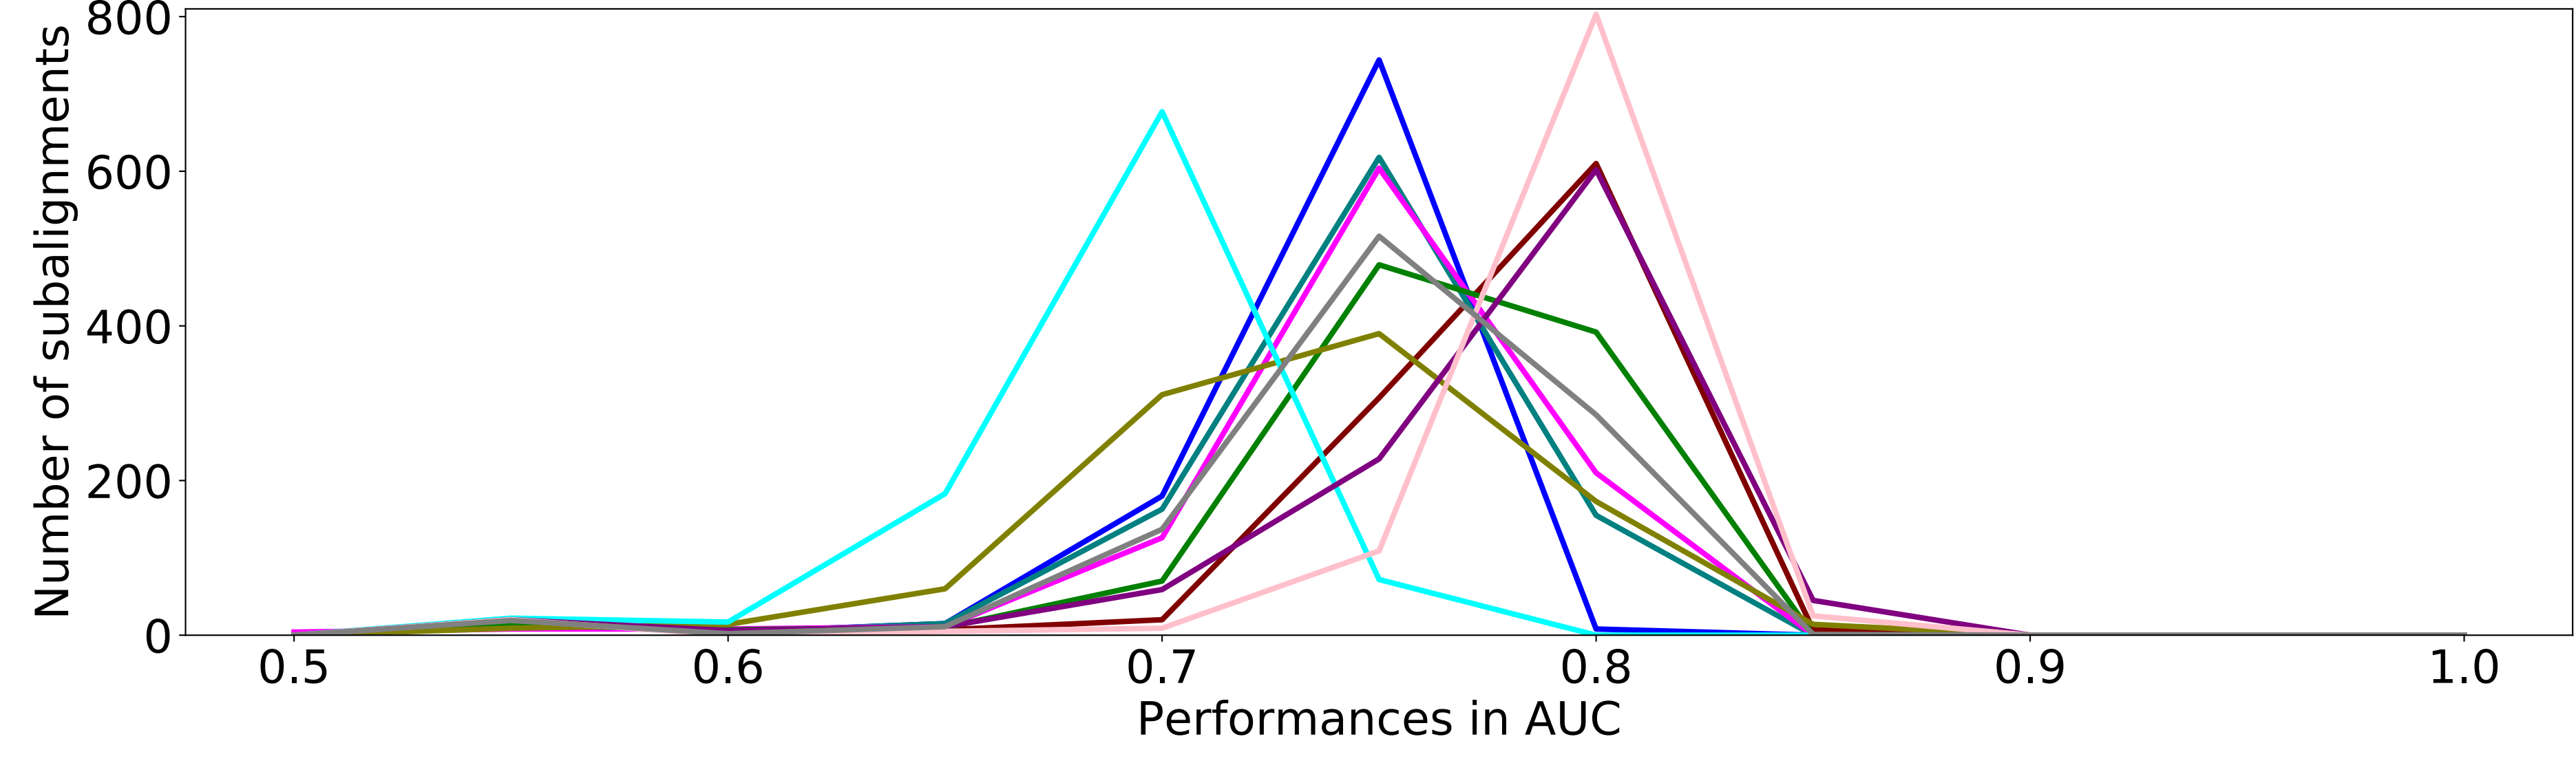

75%

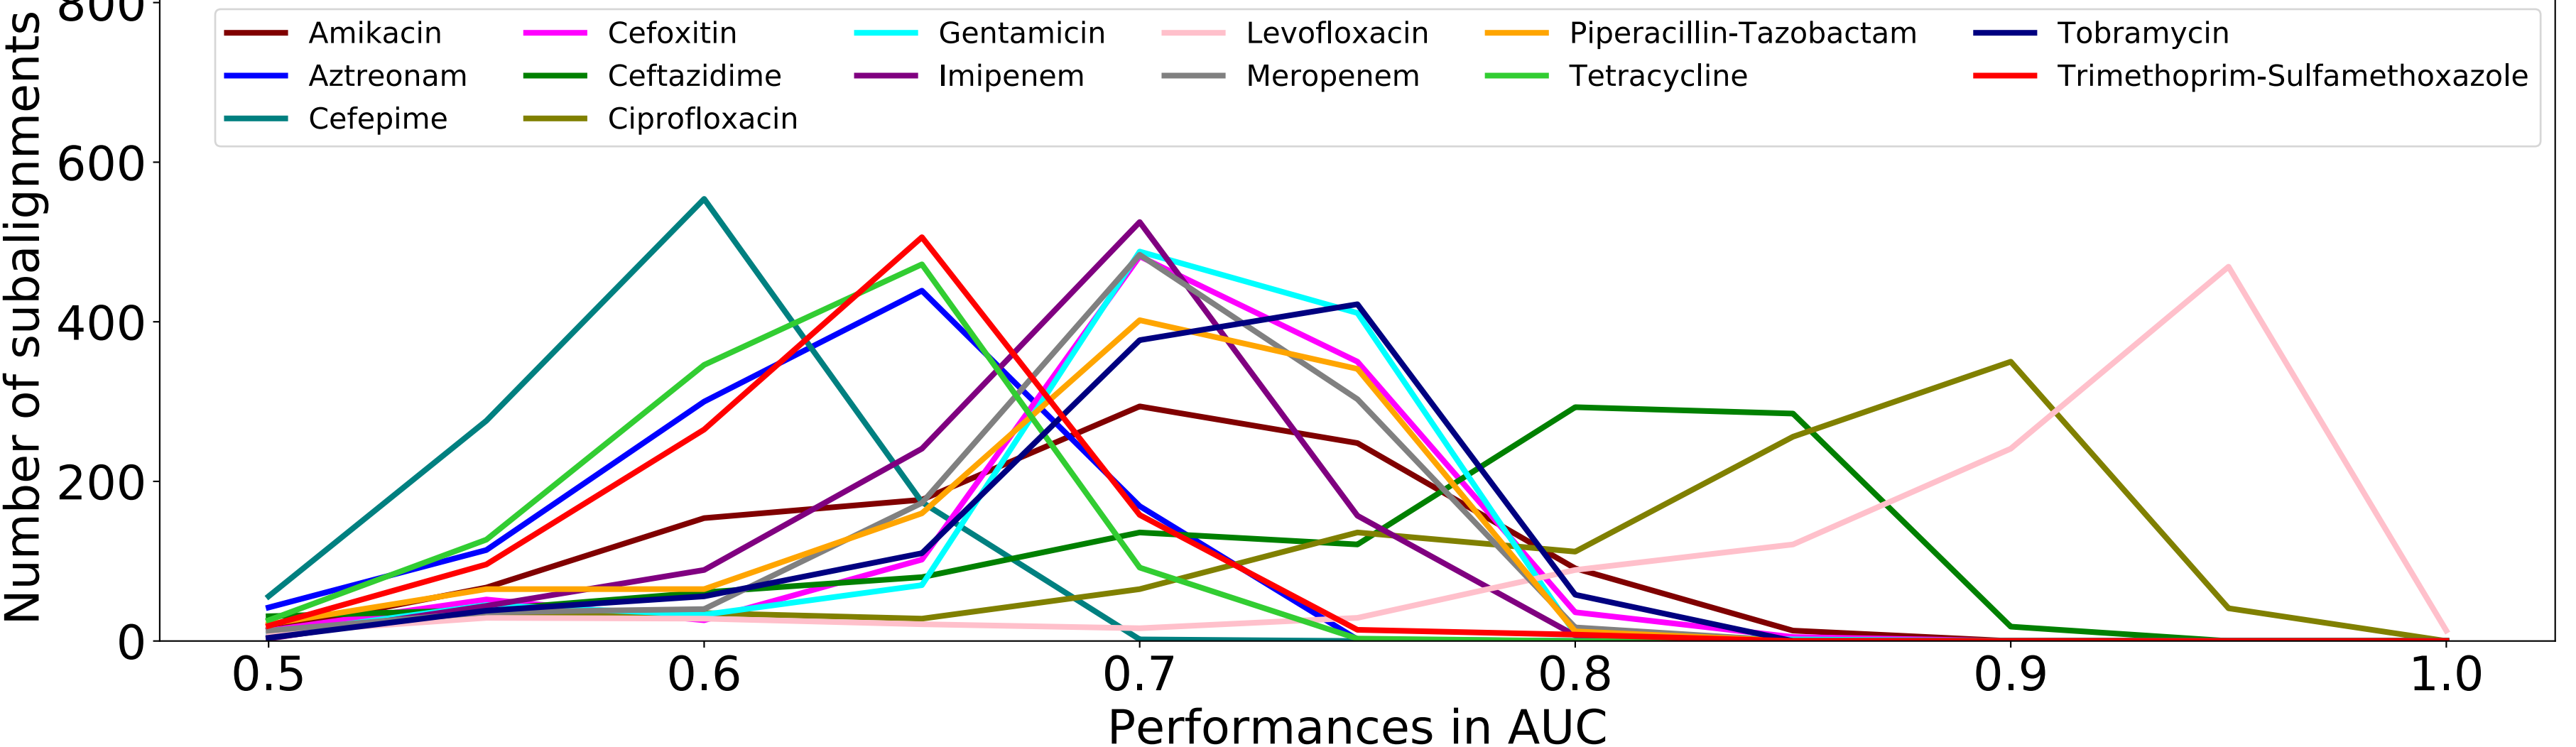

95%

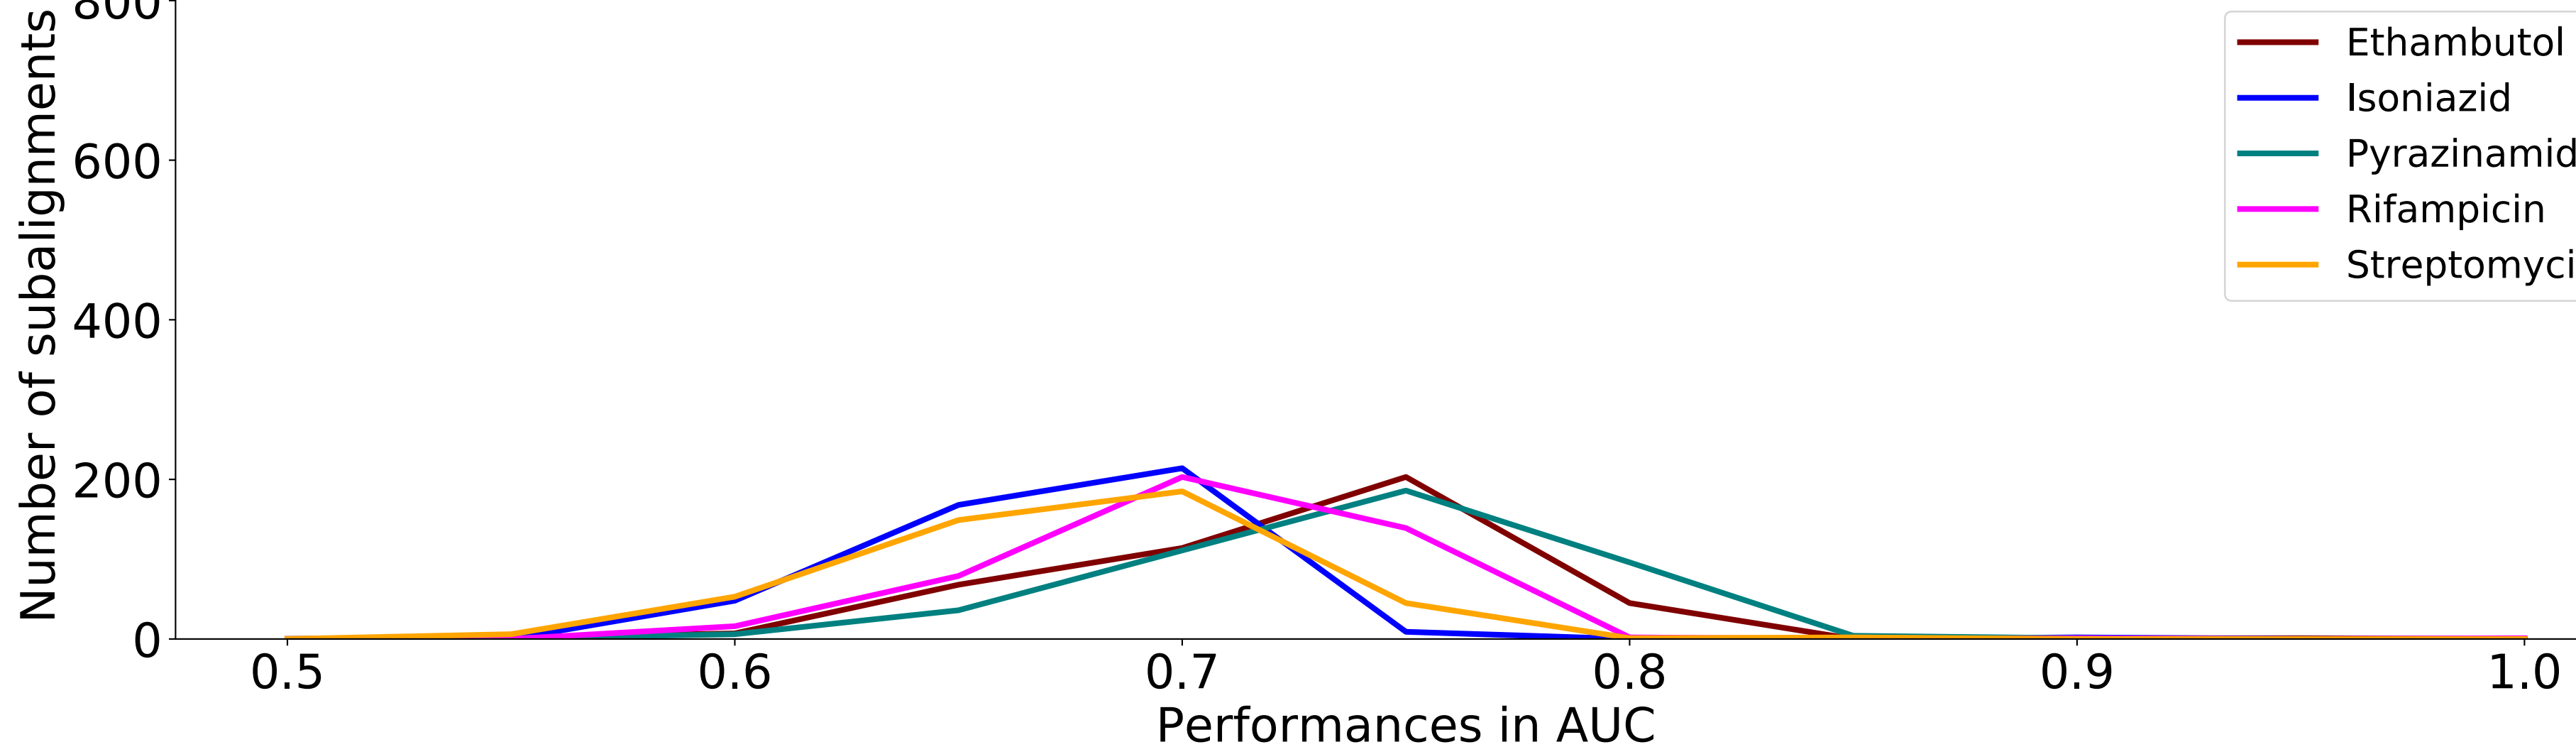

95%

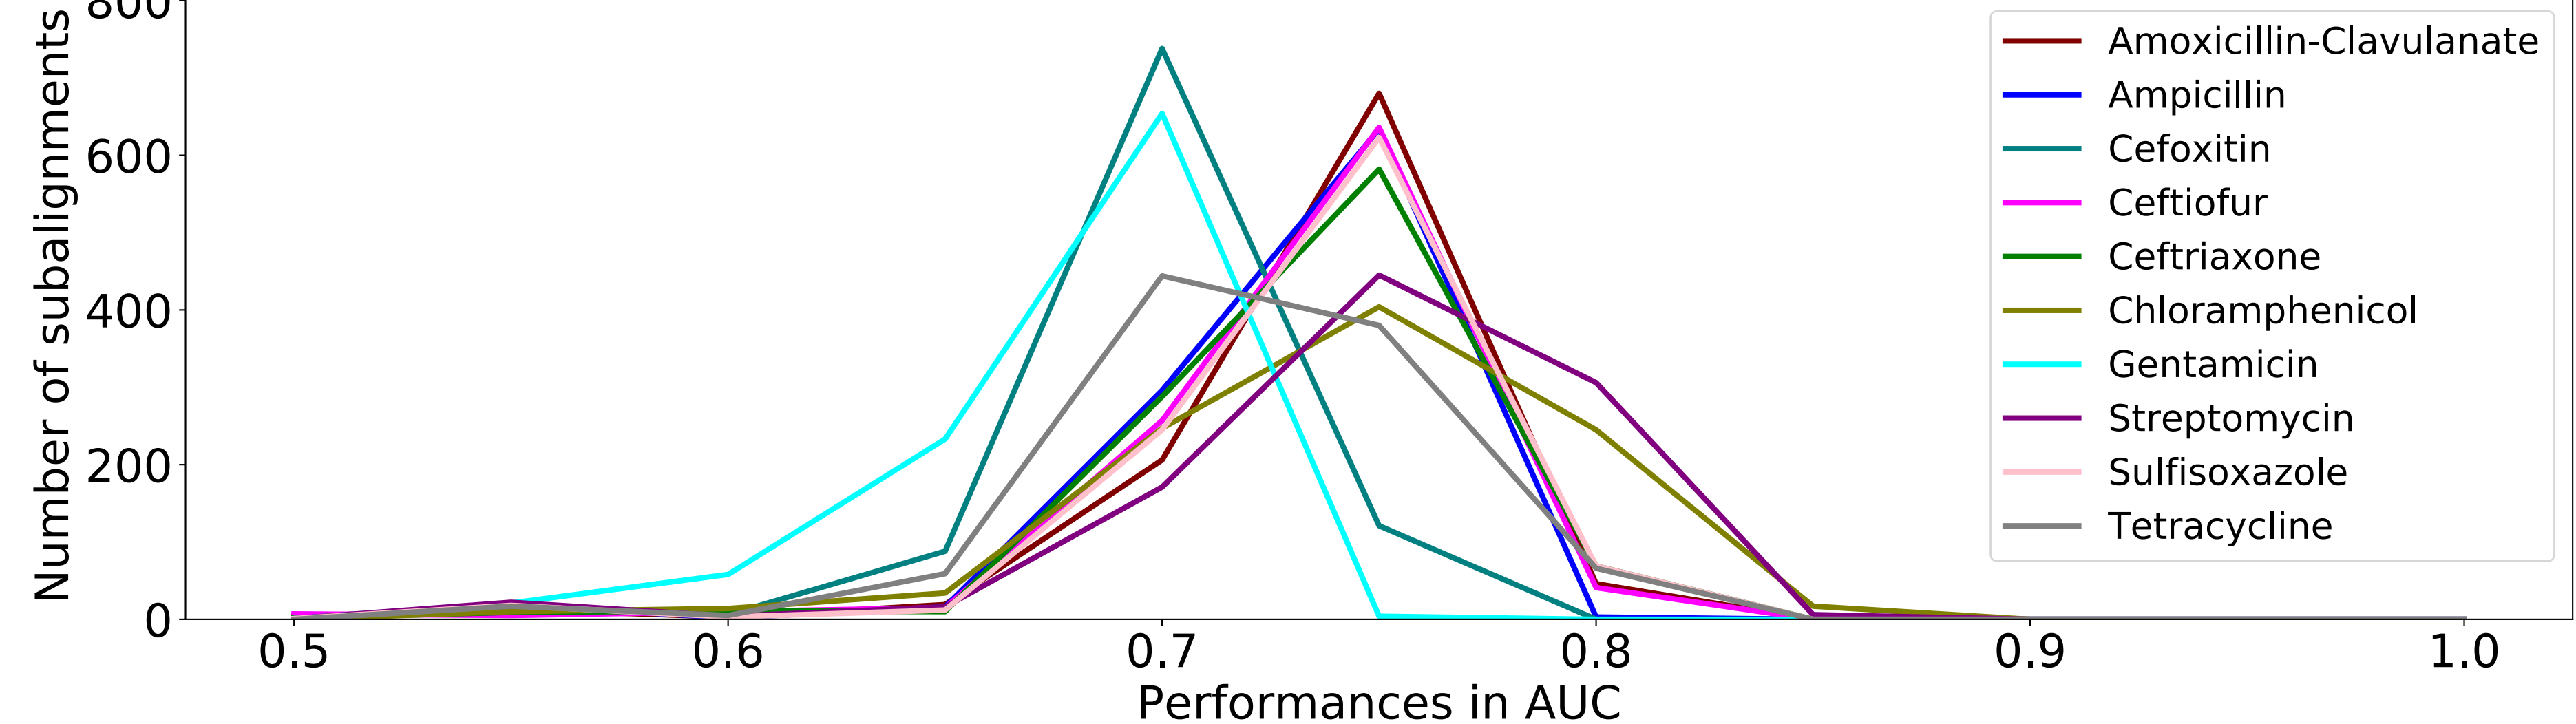

Supplement: msystems.00185-21-sf007.pdf [file msystems.00185-21-sf007.pdf]

*K. pneumoniae*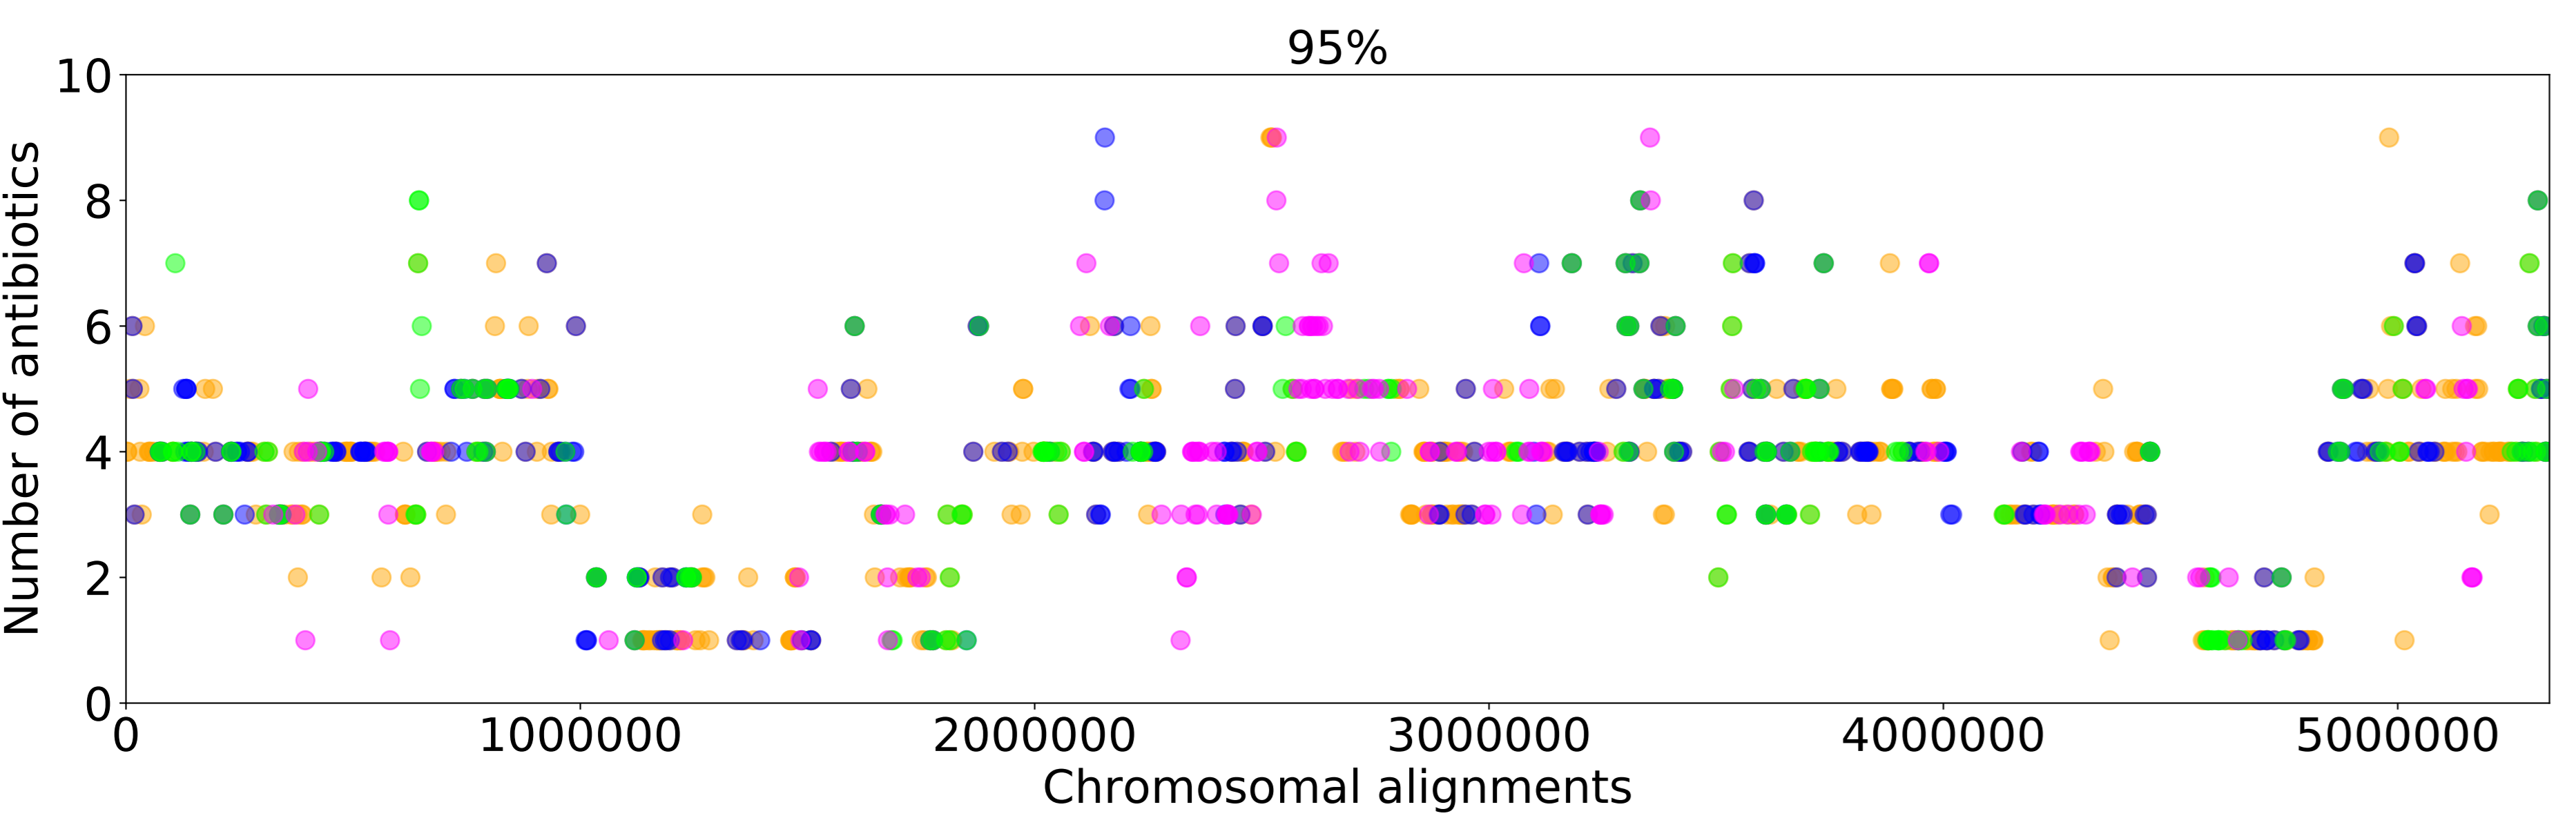*M. tuberculosis*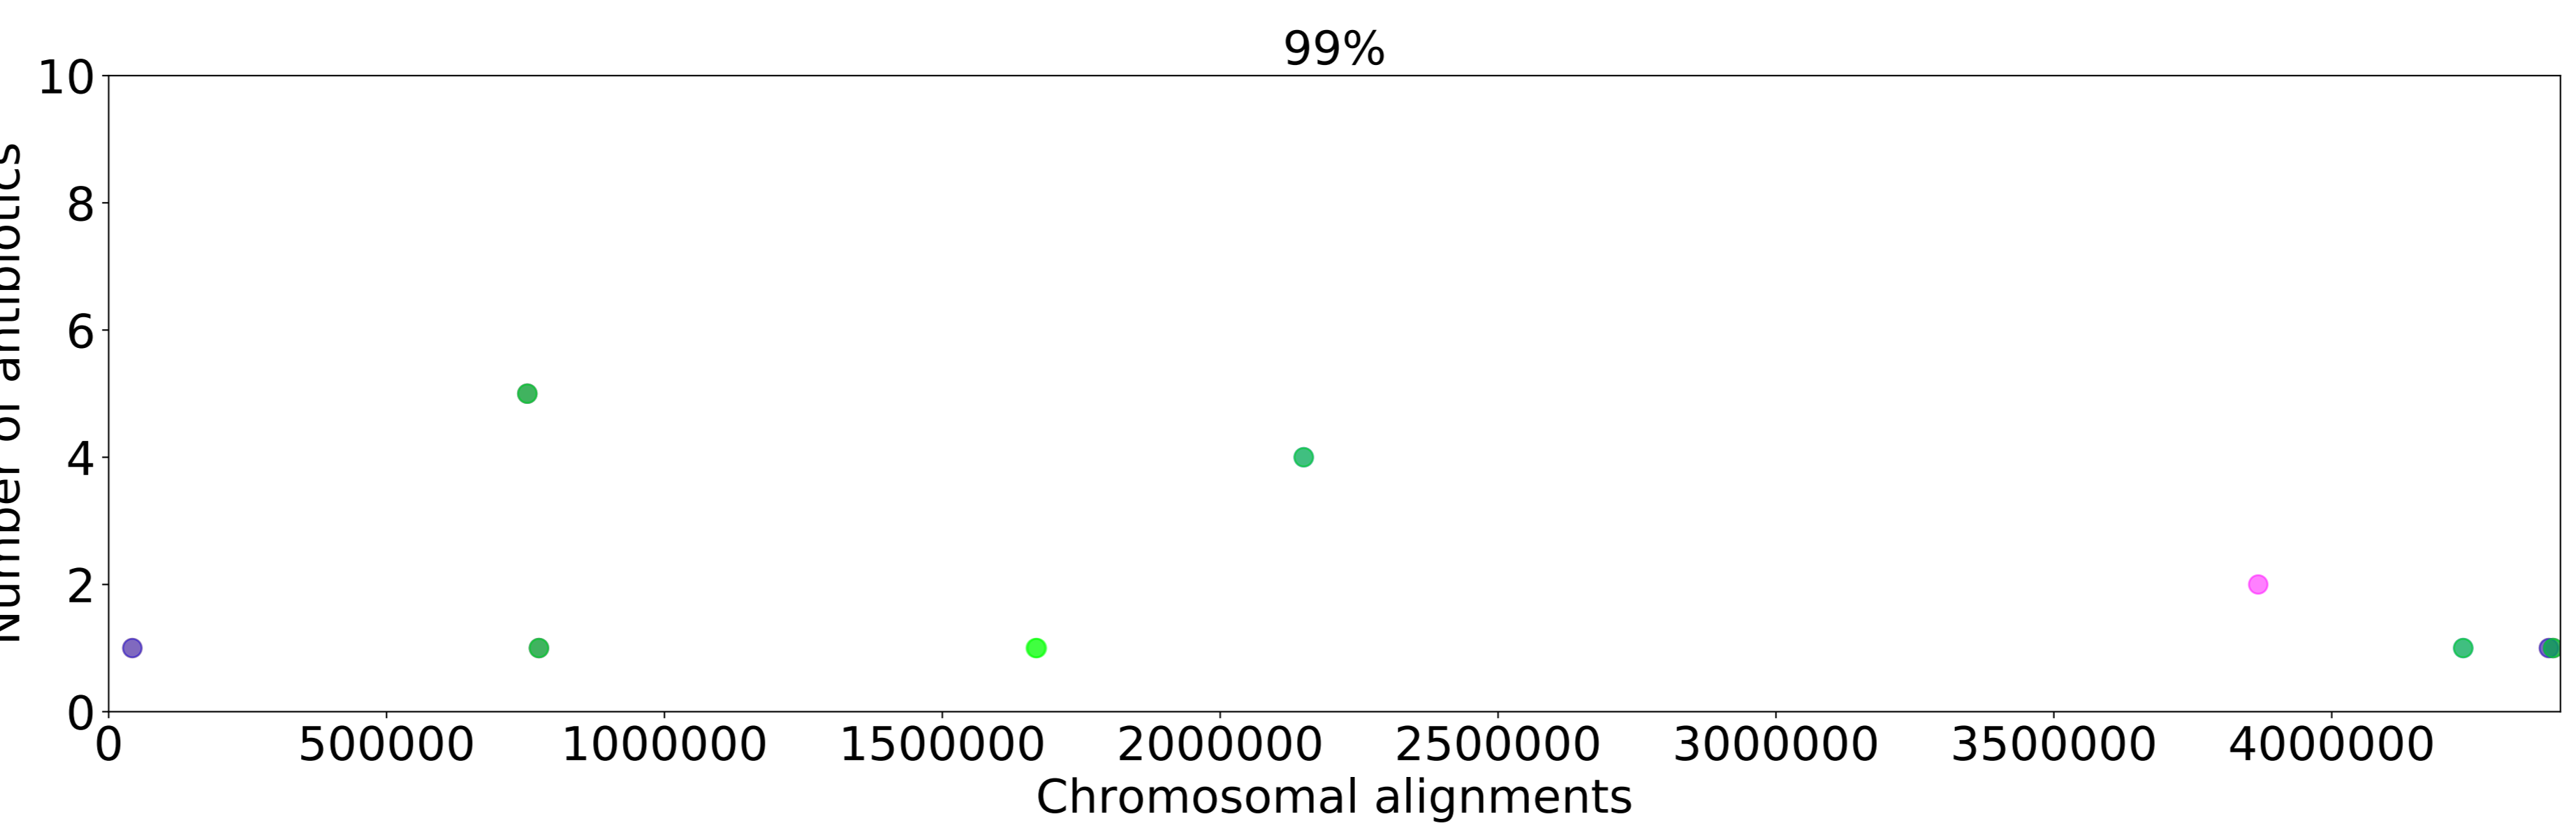*S. enterica*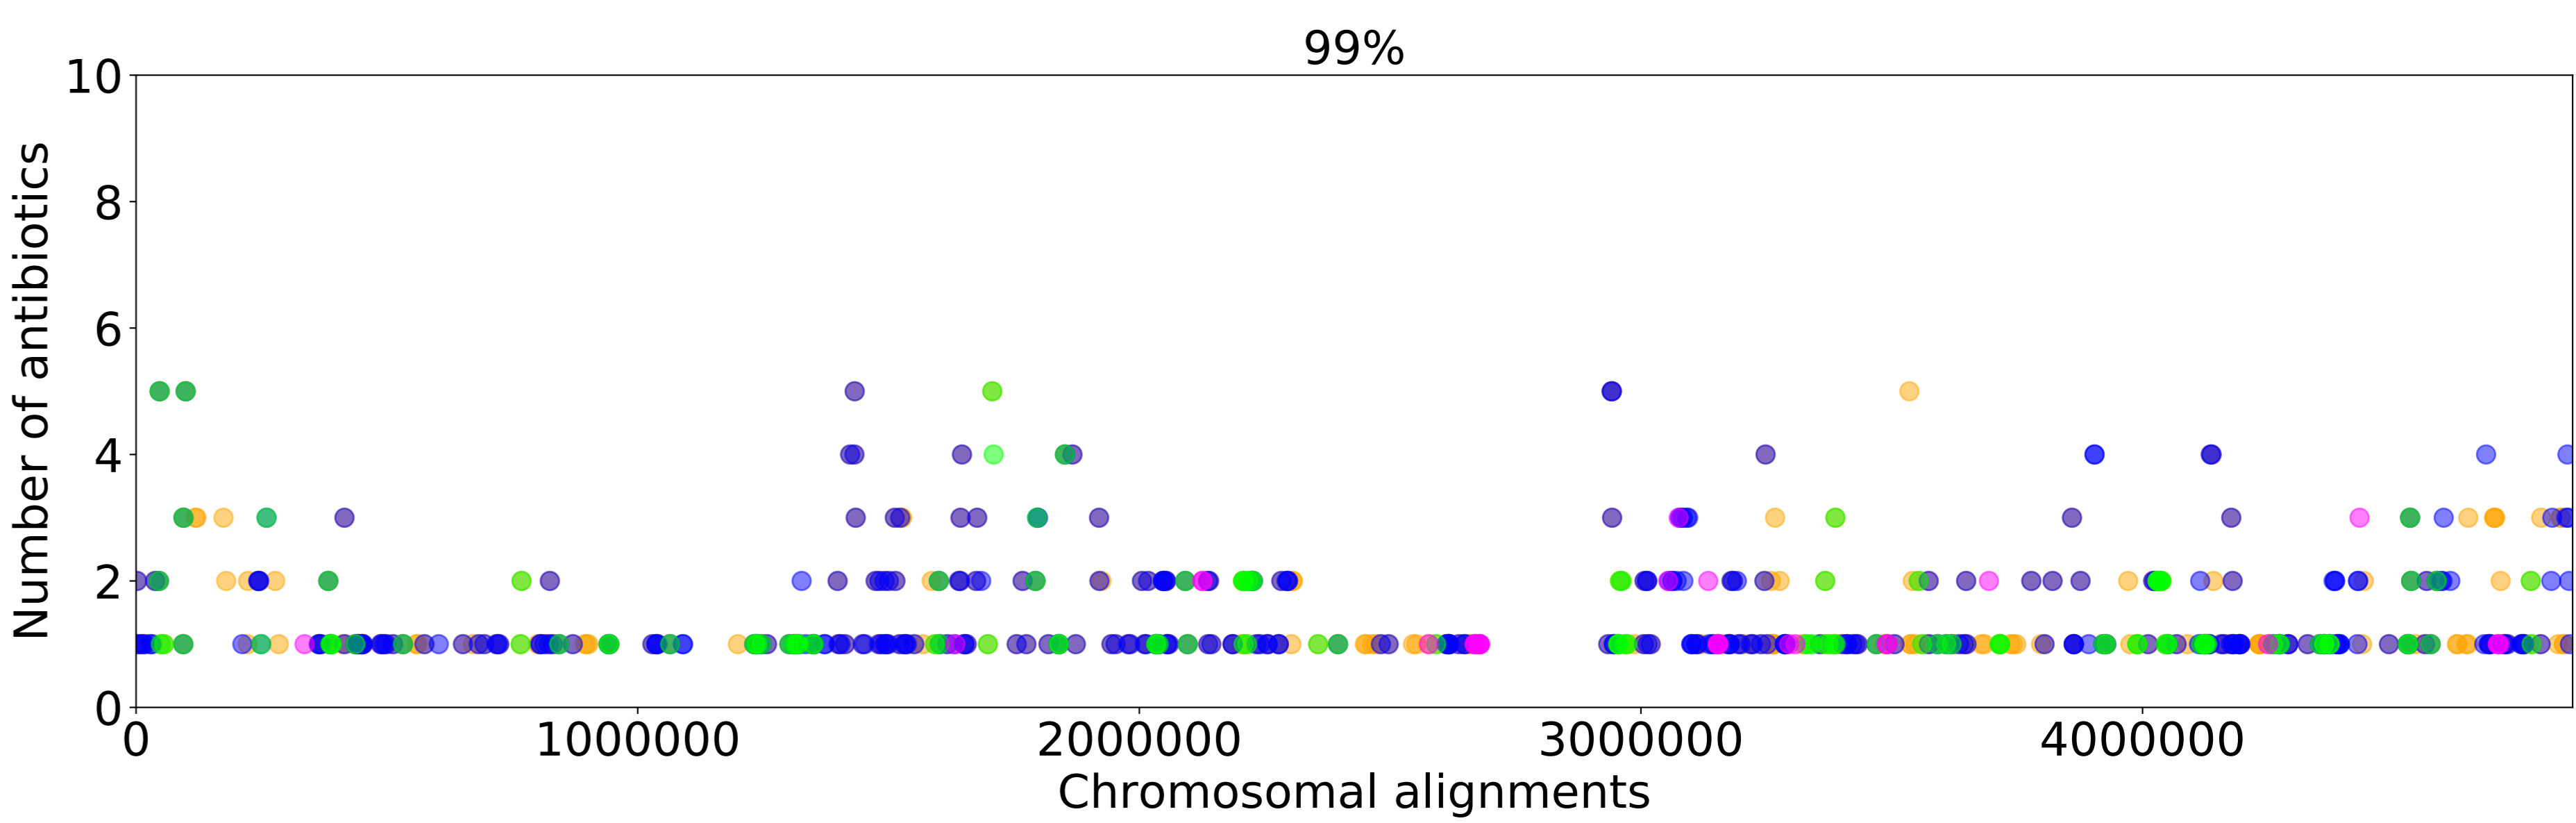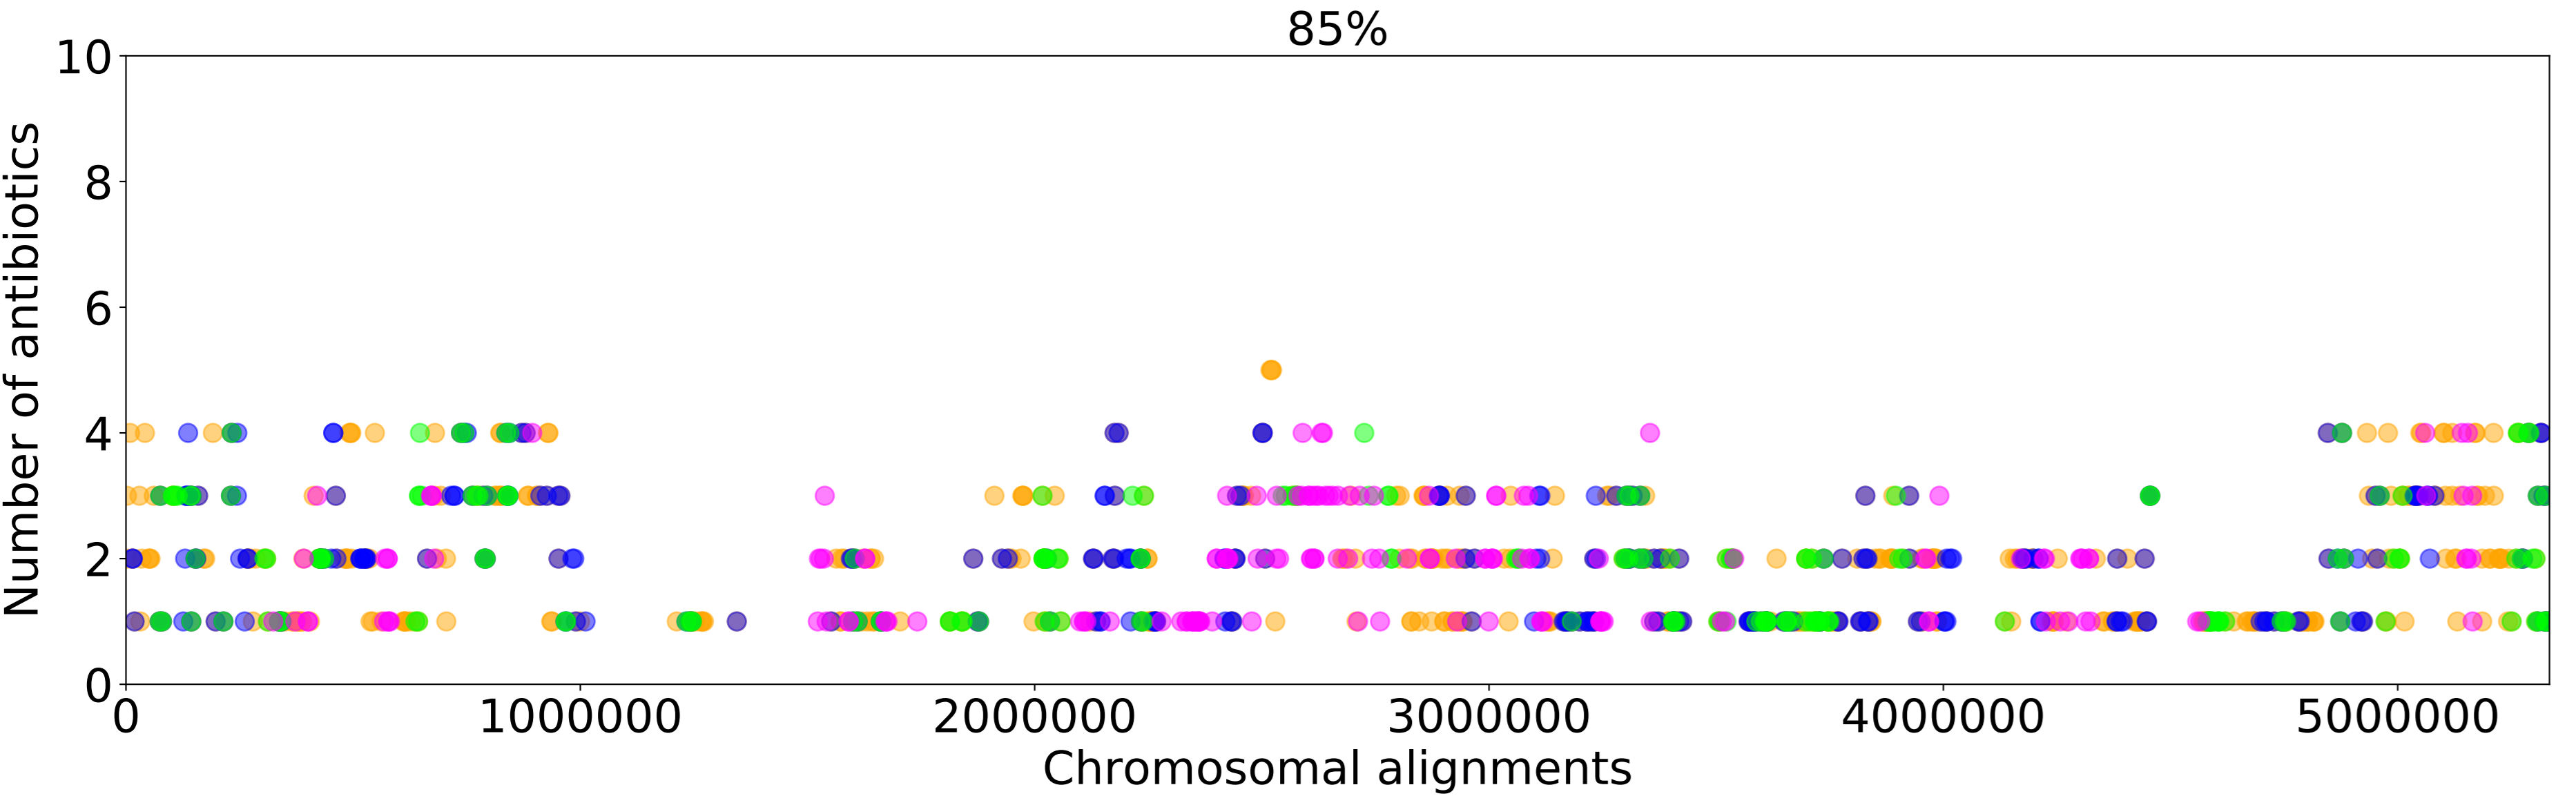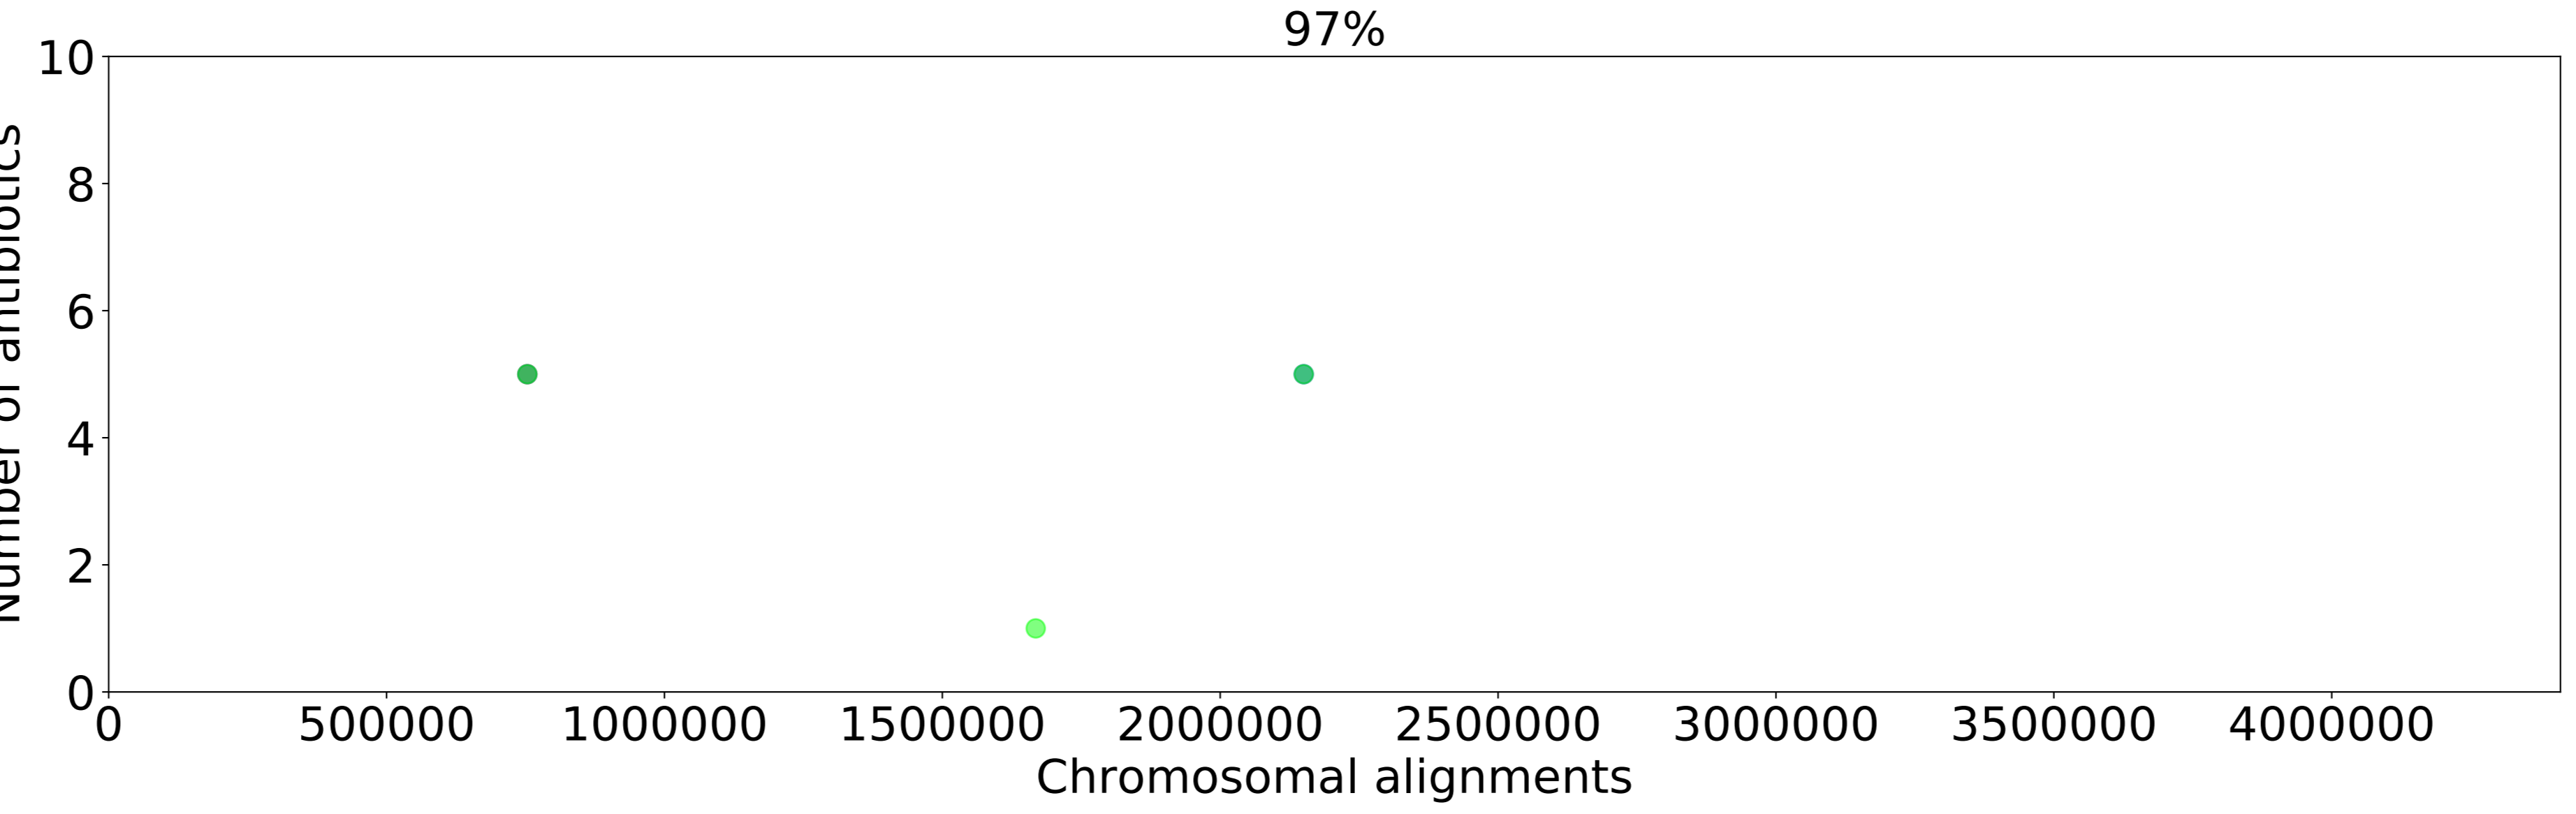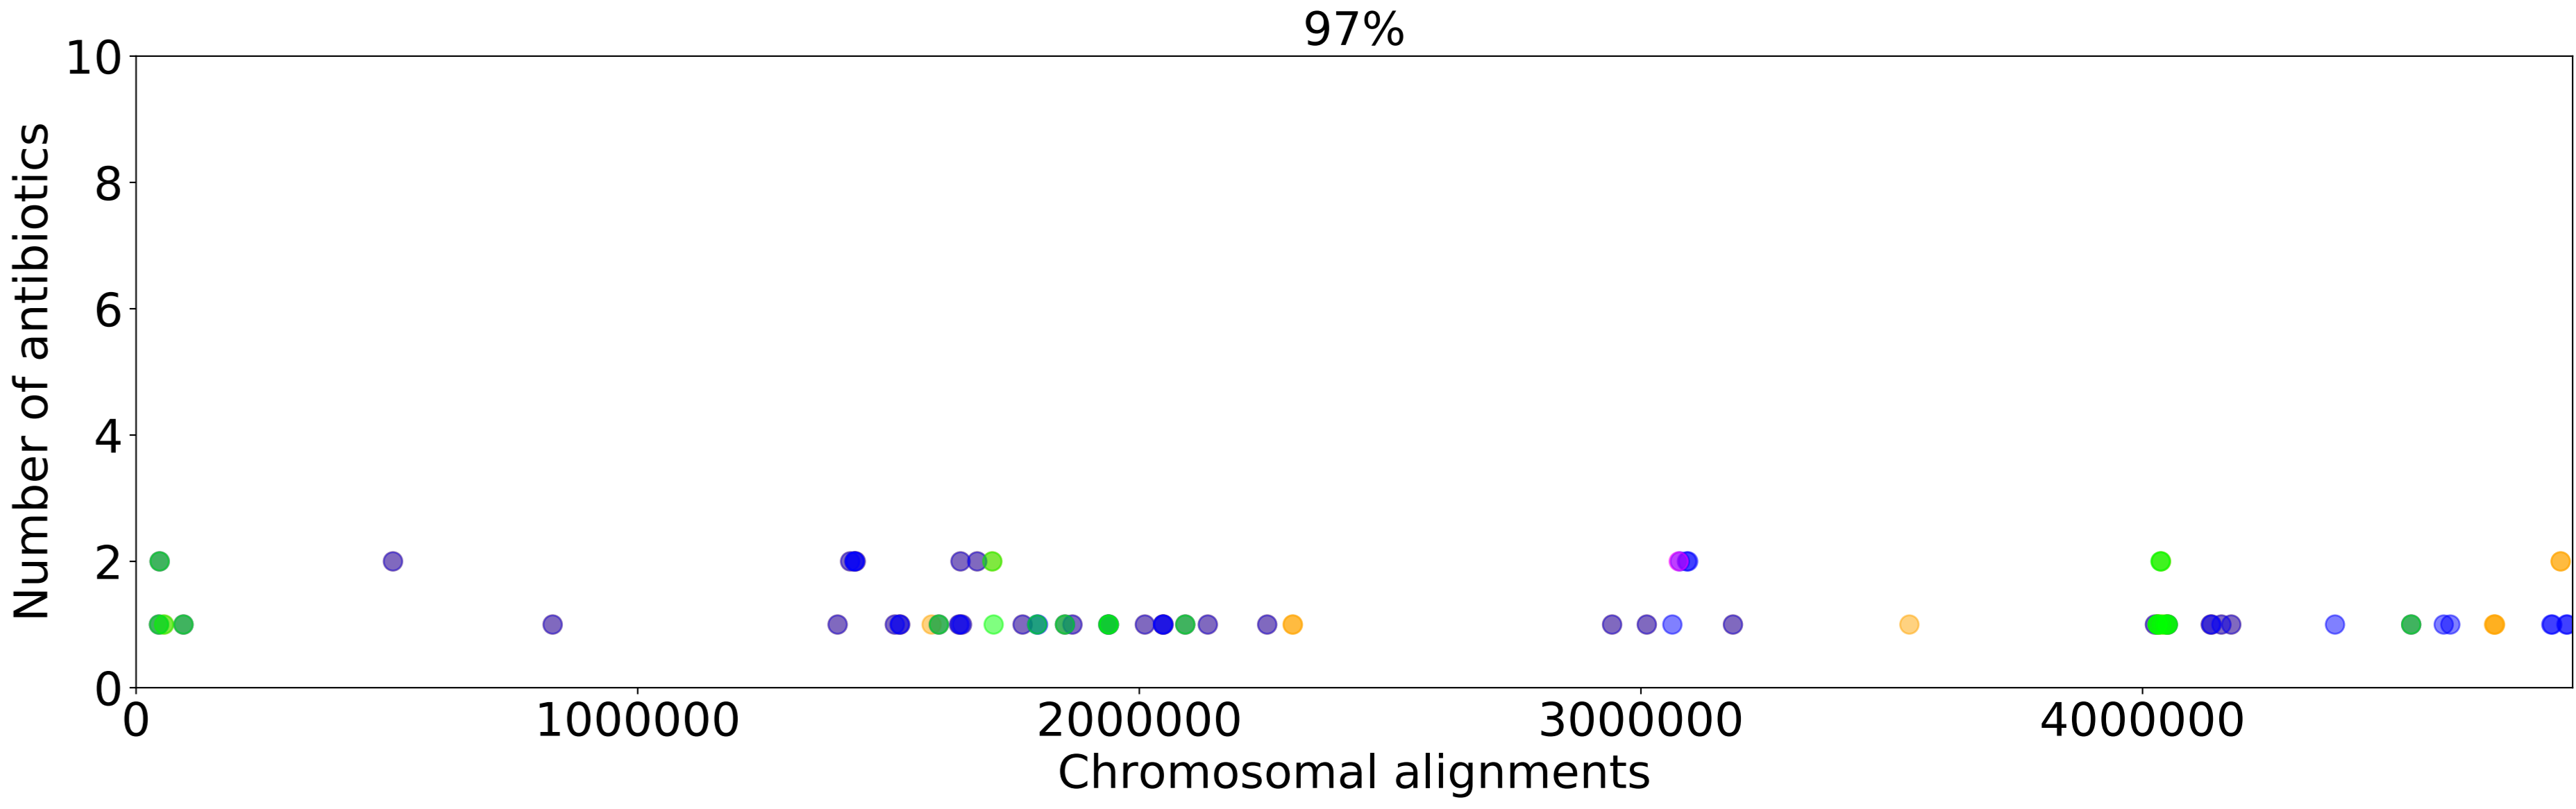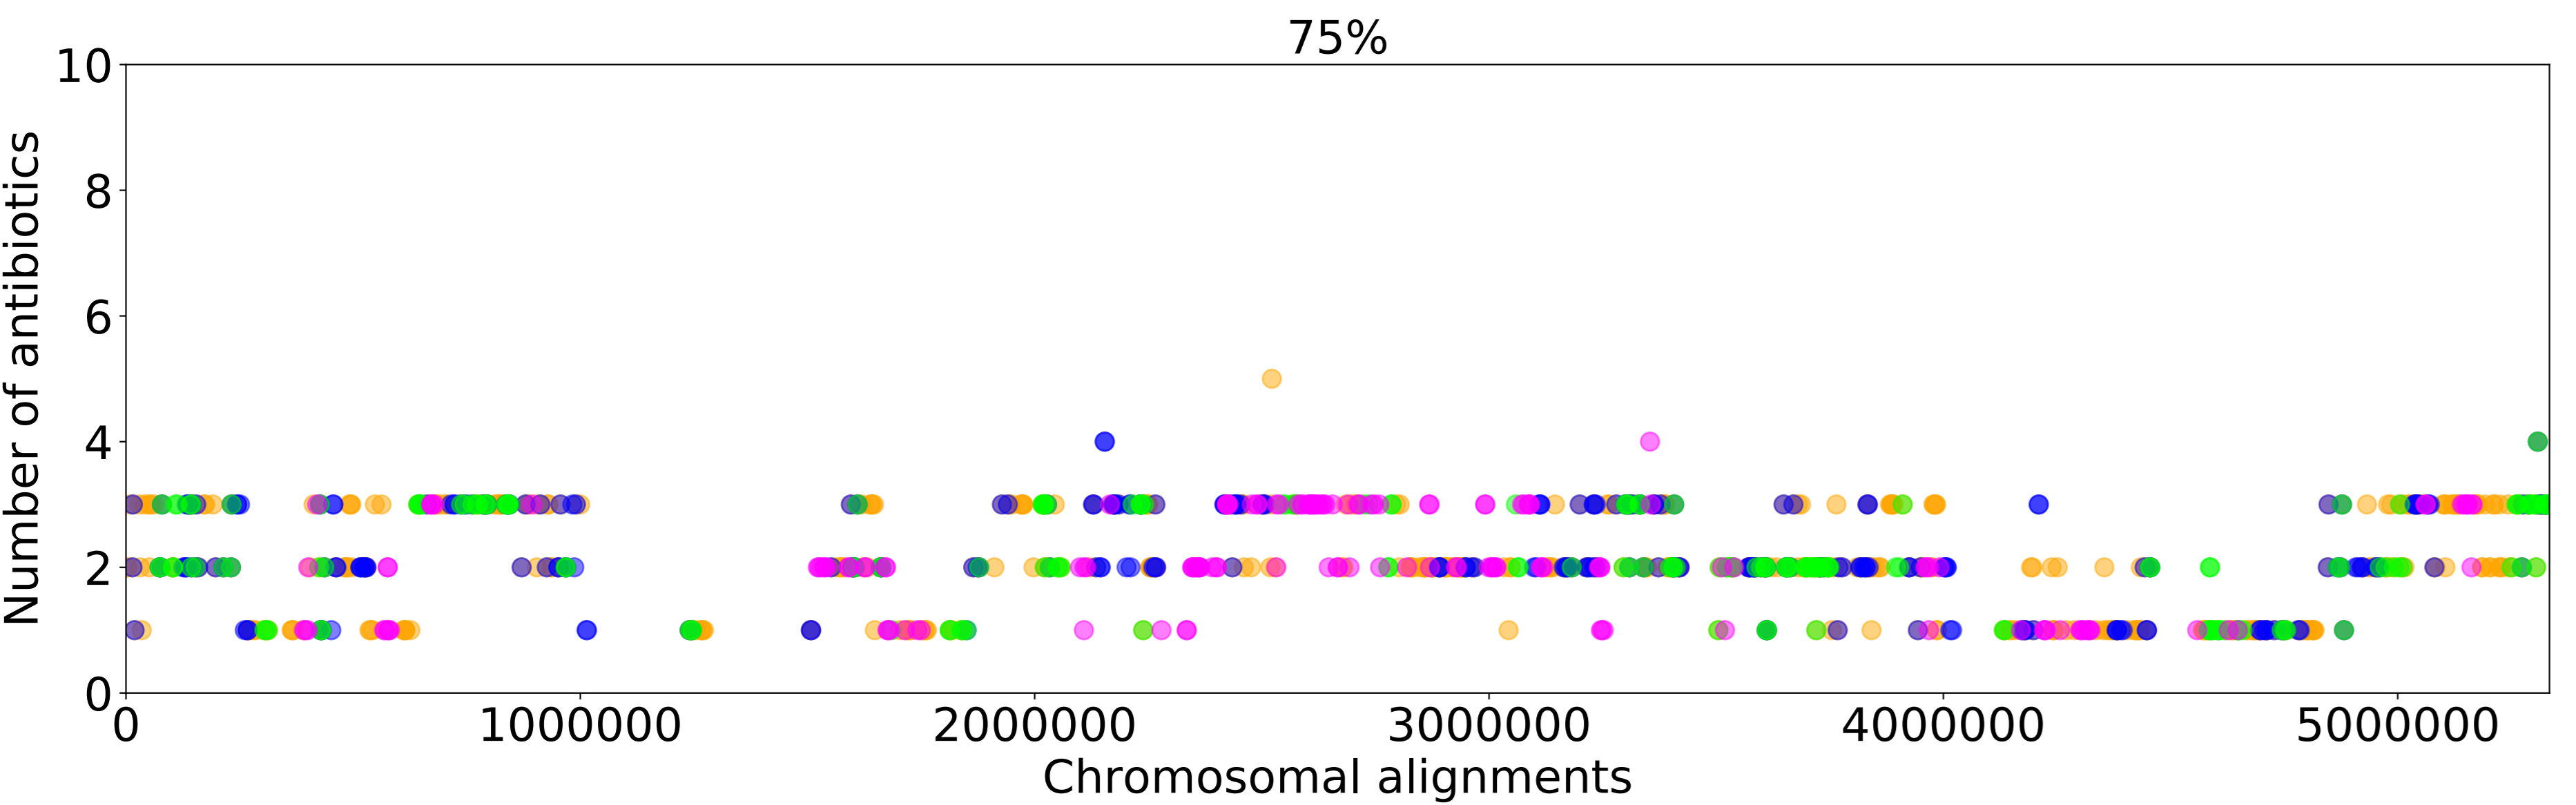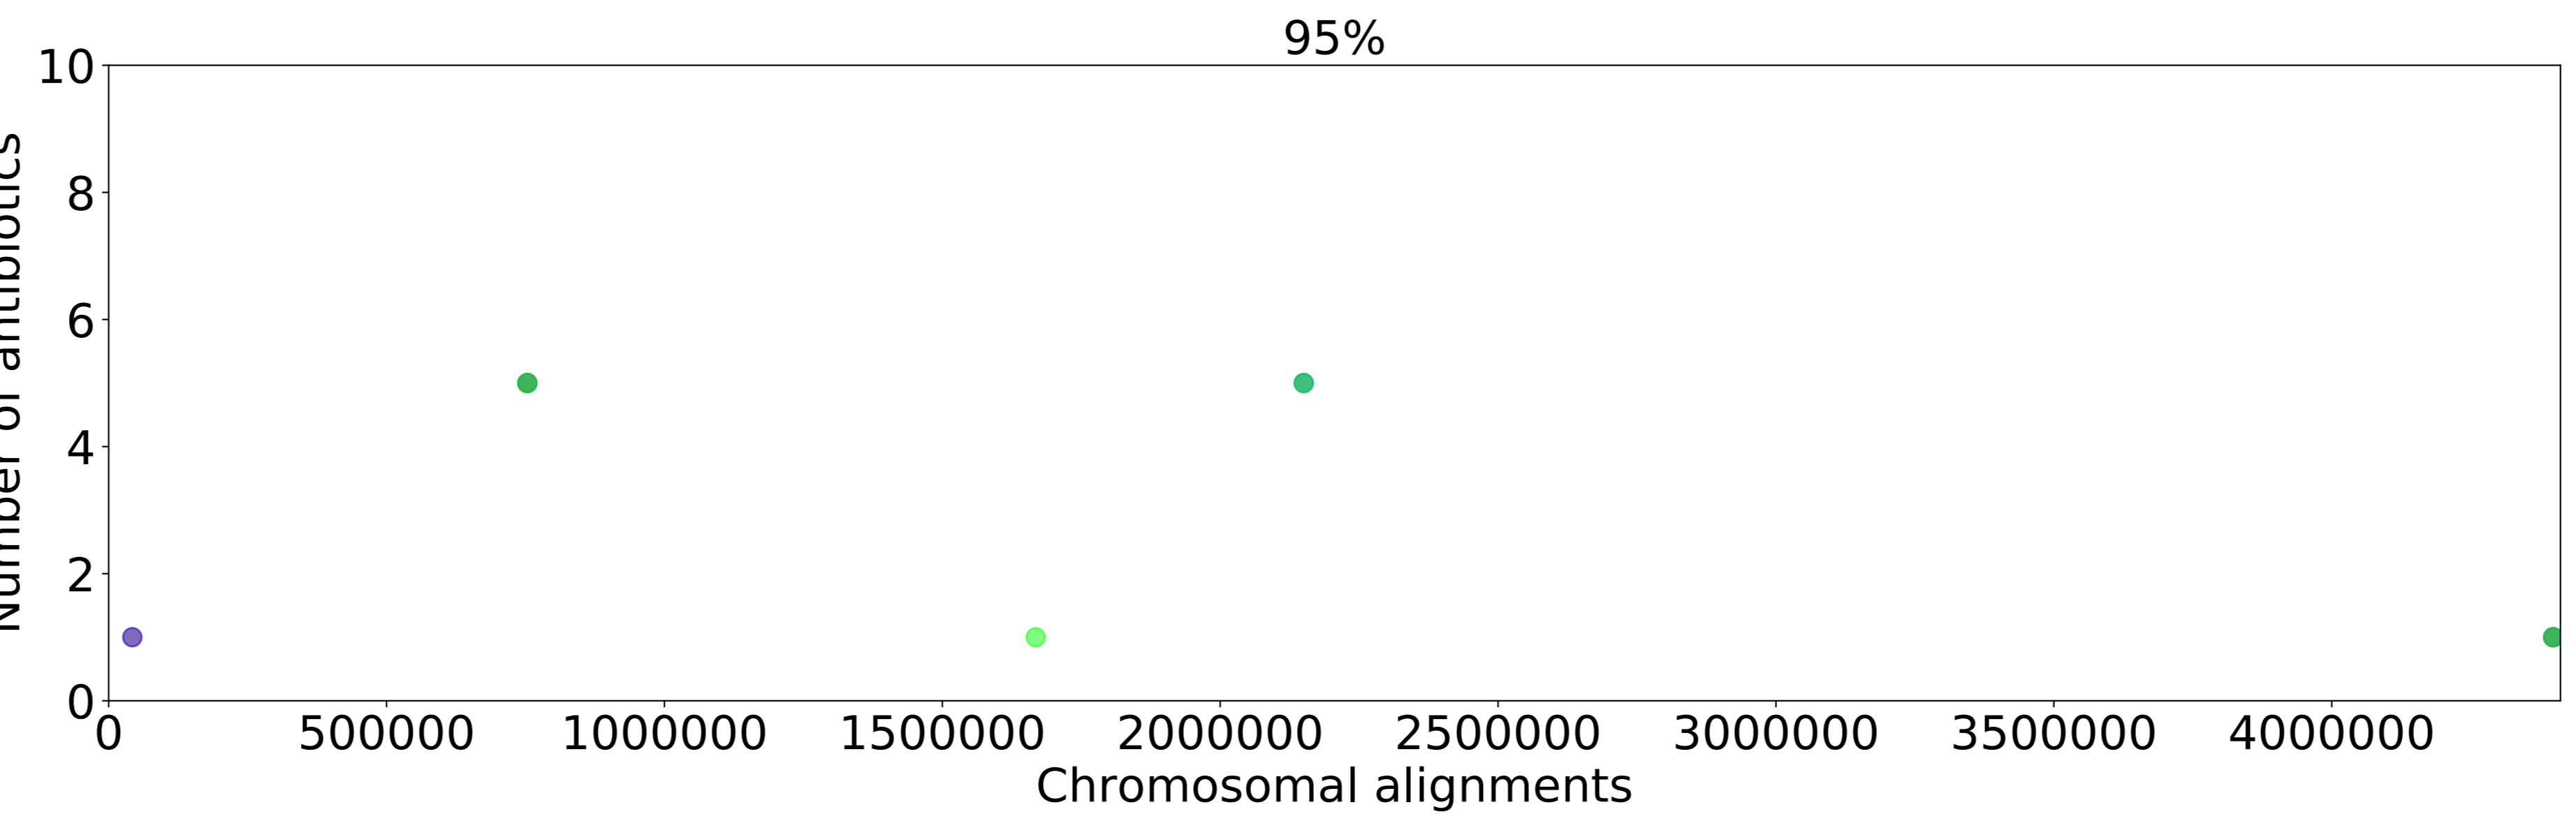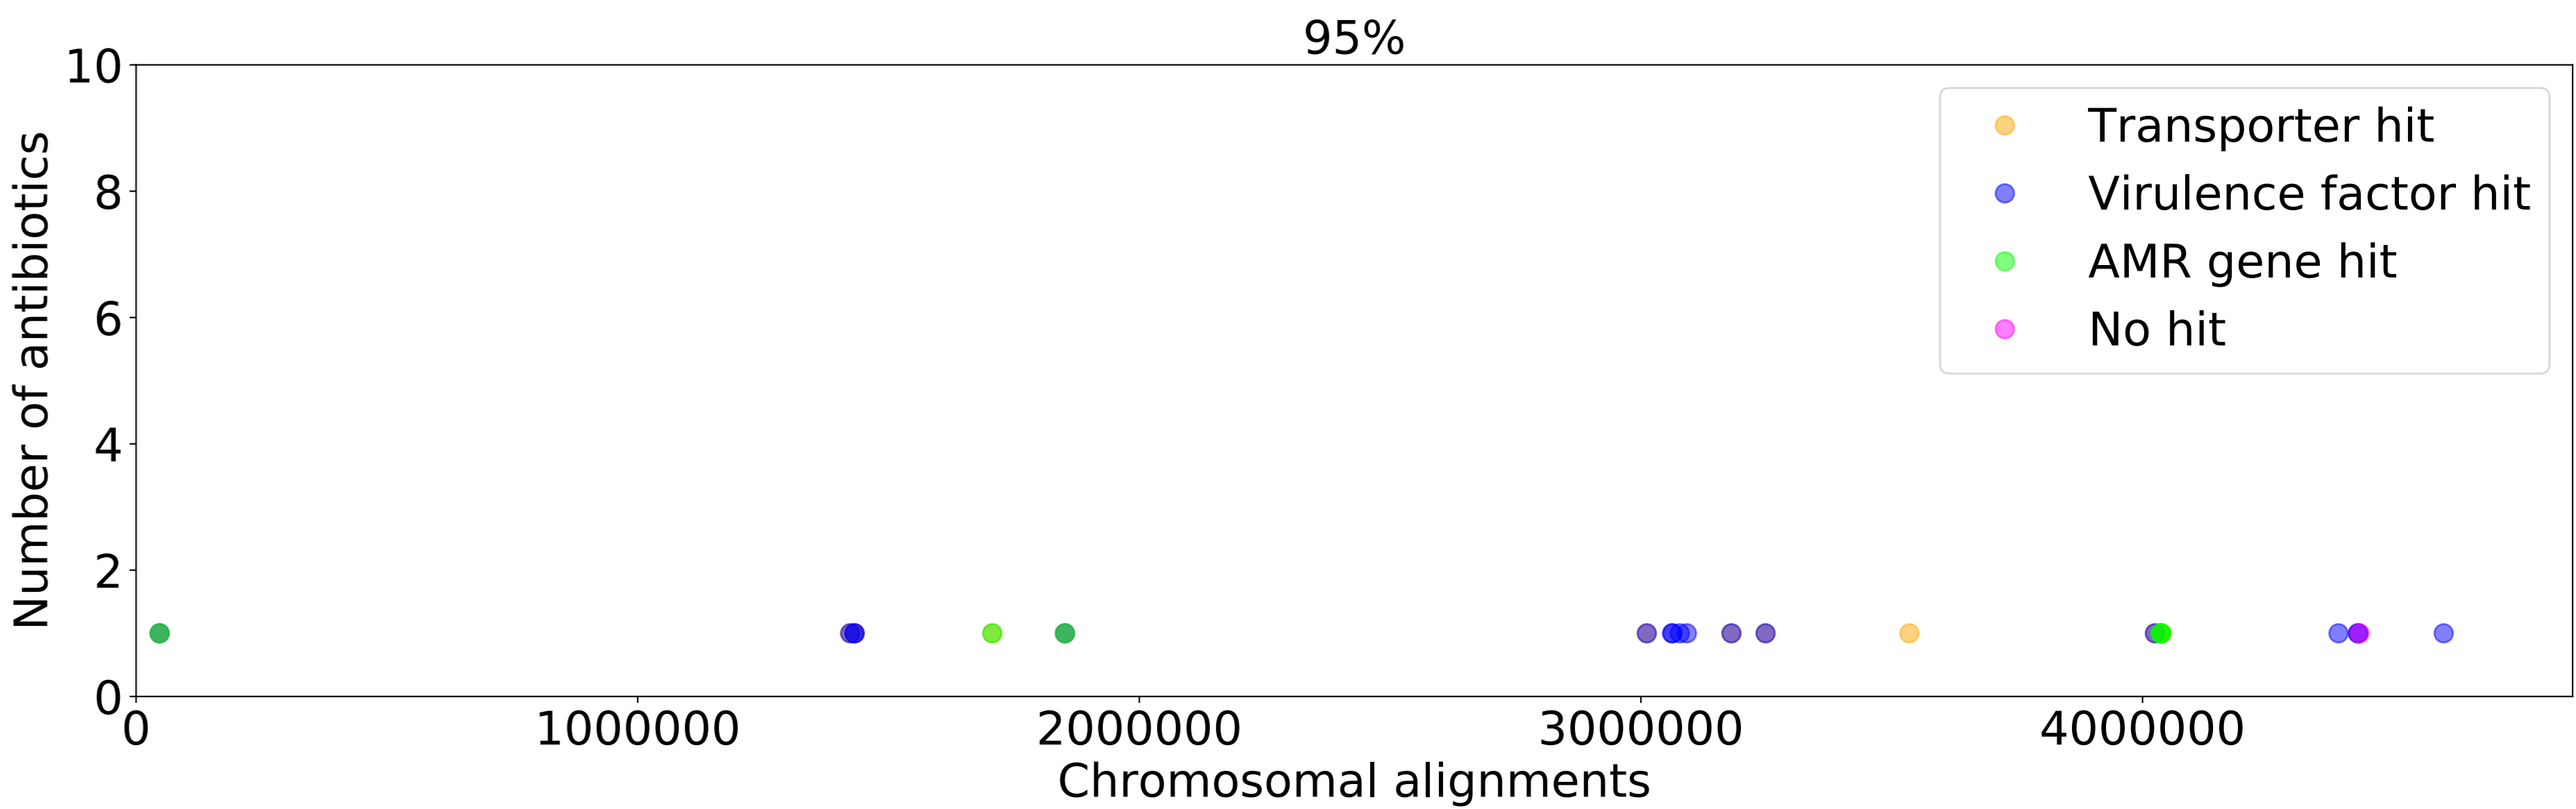

Supplement: msystems.00185-21-sf008.pdf [file msystems.00185-21-sf008.pdf]
